# Supplementary material for: Divergent folding-mediated epistasis among unstable membrane protein variants
Source: eLife. 2024 Jul 30;12:RP92406. doi: 10.7554/eLife.92406 (PMC11288631; doi:10.7554/eLife.92406)
Supplement: Supplementary file 4. [file elife-92406-supp4.xlsx]

## Sheet: Intersection_high_quality_n=251
variant	idx	tm_res	WT_intensity	V276T_intensity	W107A_intensity	WT_score_norm	V276T_score_norm	W107A_score_norm	WT_counts_avg	V276T_counts_avg	W107A_counts_avg	V276T_epistasis	W107A_epistasis	WT_rosetta_DDG	cluster_label
N4F	66	SOL	1470.86	697.792	115.587	0.402455	0.391569	0.635744	642.5	1618.75	926.75	-0.0377978	0.440322
N4Y	73	SOL	1812.47	783.931	117.484	0.498744	0.468367	0.65313	103	418	2167.5	-0.130237	0.24776
N4H	77	SOL	1013.89	448.21	116.535	0.278456	0.259193	0.649567	619.5	760	4468.5	-0.108404	0.820543
N4K	82	SOL	713.303	296.395	121.278	0.195092	0.173222	0.677148	1074.5	596.5	3473.25	-0.170327	1.21208
E8Q	163	SOL	4357.41	1622.18	241.73	1.18712	0.940164	1.34362	1275	1207.5	2756	-0.28022	0.0920953
N12V	235	SOL	3543.05	995.484	243.505	0.968175	0.589195	1.3466	2698.75	545.5	6068.75	-0.561628	0.3063
N12P	246	SOL	3356.59	1305.94	224.904	0.919088	0.748861	1.24299	1006.5	1620.75	1800.5	-0.236116	0.280899
N12K	250	SOL	3284.18	1505.82	221.509	0.901161	0.884026	1.2279	2715	393.25	10122.2	-0.071896	0.287497
A16F	318	SOL	4150.54	1651.98	270.392	1.1346	0.934557	1.49858	3505.5	1822.25	8440.5	-0.213374	0.252784	0.43	Cluster 3
A16T	324	SOL	4021.11	1554.92	266.243	1.09855	0.919213	1.47285	8403	1599	13779	-0.242244	0.269002	-0.84	Cluster 3
A16Y	325	SOL	4085.47	1655.09	246.858	1.11385	0.941342	1.37531	4135.5	343.25	9269	-0.195695	0.177527	-0.87	Cluster 3
A16G	326	SOL	4345.11	1785.69	287.031	1.18748	1.05626	1.58474	7666.5	1306.5	12882.2	-0.18136	0.266692	-1.72	Cluster 3
A16S	327	SOL	4458.64	1657.6	267.991	1.2181	0.963464	1.48247	5898	1179.25	6160.25	-0.281588	0.172261	-5.66	Cluster 3
A16H	329	SOL	3672.99	1314.9	263.769	1.00312	0.762975	1.46841	5082.75	982	4024.25	-0.319356	0.350219	-0.1	Cluster 3
A16Q	331	SOL	3500.19	1270.56	279.315	0.955185	0.717394	1.55265	4183.75	507.25	9969.25	-0.305474	0.455675	-2.32	Cluster 3
A16R	332	SOL	3310.33	1452.15	240.678	0.90443	0.843876	1.33282	7291	778	8090.75	-0.116114	0.362559	-1.59	Cluster 3
A16D	335	SOL	3941.82	1557.51	266.899	1.07786	0.928875	1.47464	6858.75	3239	14037	-0.220668	0.291381	-4.4	Cluster 3
S20I	400	SOL	1703.65	574.92	251.325	0.465518	0.327289	1.39481	5164.5	144.25	10440.2	-0.378414	1.07012	1.98	Outlier
S20C	404	SOL	653.91	305.741	171.103	0.179027	0.174977	0.945891	12011.8	2451.75	9766.25	-0.0523435	1.6432	1.27	Outlier
S20M	405	SOL	1564.36	800.6	236.612	0.426503	0.454494	1.3104	3951.75	809.5	7341.5	0.038019	1.0951	0.4	Outlier
S20W	407	SOL	1834.97	786.561	279.624	0.50139	0.465541	1.54672	6233.75	2006.25	6101.25	-0.139227	1.10257	6.23	Outlier
S20T	408	SOL	3577.11	1342.68	203.52	0.97781	0.759239	1.13229	5186	436.5	8881.5	-0.271999	0.11736	-0.64	Cluster 3
S20G	410	SOL	2776.13	1810.5	214.819	0.758985	1.05777	1.1887	4716.25	1202.5	14413.2	0.28043	0.424886	3.97	Outlier
S20N	412	SOL	1860.7	586.577	159.955	0.509728	0.327571	0.888405	4611.25	327.5	12773.8	-0.446516	0.530094	0.73	Cluster 2
S20H	413	SOL	1749.54	462.194	163.572	0.480677	0.265705	0.903195	2846.5	350.25	5715.5	-0.623236	0.614052	1.42	Cluster 2
S20D	419	SOL	1315.2	421.339	125.875	0.360274	0.248951	0.700867	159.75	1138.5	9192.25	-0.430417	0.637454	3.17	Cluster 1
I24L	485	SOL	4000.44	1686.79	234.778	1.09292	1.00172	1.30226	237	619	2803	-0.155689	0.148387	-2.91	Cluster 3
I24M	489	SOL	4050.25	1485.1	215.788	1.11088	0.832476	1.19765	1713.5	511.25	3016.5	-0.29541	0.0516678	-1.96	Cluster 3
L28N	580	SOL	2427.79	443.016	245.155	0.667923	0.247741	1.358	825	344.25	4199.25	-0.993242	0.691061	-1.31	Outlier
L28D	587	SOL	1993.63	610.404	216.097	0.546578	0.358393	1.20044	483	554.25	770.5	-0.475707	0.761921	3.93	Outlier
T32V	655	SOL	554.193	443.435	190.19	0.151778	0.266804	1.06154	2163.5	2628	3403.5	0.484926	1.91442	3.01	Outlier
T32A	658	SOL	1302.89	321.98	166.318	0.356449	0.187957	0.925658	6128.75	930.5	7319	-0.689963	0.92547	-1.04	Cluster 2
T32Y	661	SOL	531.96	282.751	144.003	0.146258	0.165615	0.797897	2257	1804	8063.5	0.075886	1.67717	1.94	Outlier
T32S	663	SOL	3735.65	1708.19	198.359	1.02198	0.999067	1.10684	5475.5	894	9519.75	-0.0746012	0.0483086	-3.38	Cluster 3
T32N	664	SOL	2237.84	802.27	196.55	0.613705	0.466179	1.08759	1386.5	1487	11341	-0.317935	0.551557	-0.05	Outlier
T32H	665	SOL	1273.59	418.394	200.739	0.350214	0.248322	1.12021	8466.25	352.25	13270.8	-0.405282	1.13632	1.7	Outlier
T32P	666	SOL	773.198	359.946	160.058	0.212692	0.199859	0.883777	2279.5	732.25	7297.75	-0.0566957	1.40891	-2.99	Outlier
T32E	669	SOL	1220.75	469.742	159.012	0.335398	0.272867	0.883054	109.75	133	6009	-0.24715	0.945663	0.68	Cluster 2
K36G	746	SOL	1262.01	481.429	215.867	0.343952	0.275485	1.1755	897.75	1807	343.5	-0.255812	1.21811	1.55	Outlier
K36Q	751	SOL	1848.1	453.894	136.887	0.505705	0.259074	0.759222	802	95	1145	-0.696162	0.381153	-1.5	Cluster 2
K36E	753	SOL	544.107	697.737	128.753	0.149138	0.411117	0.707751	259	618.5	2787.5	0.956583	1.54266	2.6	Outlier
T40L	821	TMD	2132.19	942.408	198.617	0.586679	0.550572	1.12322	1110.75	2112.75	876	-0.10858	0.610376	-4.64	Outlier
T42I	862	TMD	865.364	167.047	105.459	0.237454	0.09605	0.579322	4140	1059	7361.25	-0.936989	0.879075	0.74	Cluster 1
T42F	864	TMD	785.172	143.381	99.0375	0.213248	0.083058	0.547067	4575.75	752.5	5751.25	-0.99251	0.913501	-1.96	Cluster 1
T42C	866	TMD	2656.43	567.797	130.602	0.727799	0.331661	0.721853	3329.5	951.5	6589.75	-0.835088	-0.0286754	3.23	Cluster 2
T42M	867	TMD	1183	201.84	105.488	0.324048	0.117875	0.58318	4426	191.25	6266.5	-1.06045	0.566695	-0.88	Cluster 1
T42S	873	TMD	1828.39	565.256	144.864	0.502313	0.336698	0.810528	2499.5	408.75	6395.25	-0.466027	0.448511	3.71	Cluster 2
T42N	874	TMD	873.857	203.068	120.131	0.241451	0.117058	0.669939	5907	481.5	8917.5	-0.751488	0.999574	3.17	Cluster 1
T42R	878	TMD	413.119	173.939	99.6838	0.113709	0.096376	0.553007	3291.25	586	5276.5	-0.157146	1.56217	2.31	Cluster 1
T42K	880	TMD	380.796	184.808	96.4098	0.104882	0.108021	0.534238	3934.25	400	10687.5	-0.0150633	1.61025	4.45	Cluster 1
F44I	904	TMD	4375.62	1438.96	301.514	1.20117	0.807862	1.66868	5217	1715.25	9005.5	-0.404241	0.30892	-5.75	Cluster 3
F44L	905	TMD	4781.52	1697.47	254.919	1.30907	0.993239	1.41468	1682.75	729.25	4973.75	-0.327733	0.0523408	-0.71	Cluster 3
F44W	911	TMD	823.298	320.857	120.975	0.226162	0.175233	0.670003	8794.25	400.75	11792.5	-0.234437	1.06617	-0.54	Cluster 1
F44T	912	TMD	4265.91	1609.91	262.341	1.16786	0.921292	1.46201	6723	669	9347.5	-0.26659	0.195141	-2.2	Cluster 3
F44Y	913	TMD	768.774	244.822	115.986	0.210518	0.140713	0.643602	8690.5	1147.75	7602.5	-0.436378	1.09257	-2.12	Cluster 1
F44G	914	TMD	4347.46	1535	253.087	1.18909	0.90245	1.40132	5957.75	918.25	6576.75	-0.333175	0.140293	0.59	Cluster 3
F44S	915	TMD	2412.87	779.237	209.297	0.663162	0.452556	1.16405	4420.75	749.75	9504.75	-0.42237	0.539087	1.91	Outlier
F44N	916	TMD	729.5	318.527	96.8229	0.200253	0.187705	0.538708	6427	3437.25	12203.5	-0.120764	0.96443	2.32	Cluster 1
F44P	918	TMD	754.408	294.76	101.557	0.207156	0.175135	0.564554	4148.25	389.75	11587.8	-0.231886	0.978592	4.23	Cluster 1
F44R	920	TMD	382.711	245.195	94.6786	0.104715	0.139461	0.524432	3022.75	1577	8832.5	0.262663	1.58711	0.6	Cluster 1
F44K	922	TMD	423.697	273.154	101.226	0.116712	0.158045	0.55724	2483.75	1102.75	5239.5	0.268904	1.55224	4.12	Cluster 1
F44D	923	TMD	550.922	157.552	92.721	0.151043	0.089679	0.514518	6244.5	843.75	18593.8	-0.543951	1.20191	4.33	Cluster 1
S49N	1021	TMD	1278.42	182.826	103.448	0.354054	0.10631	0.571544	2602.75	788.25	699.25	-1.23696	0.469594	8.79	Cluster 1
N53K	1111	TMD	362.797	213.273	102.195	0.098955	0.125751	0.567685	1348.75	562.75	6197.75	0.176618	1.71694	5.74	Cluster 1
T64I	1324	SOL	2104.4	609.056	131.968	0.578994	0.353672	0.735057	2860.5	531	8685.5	-0.531989	0.214681	4.37	Cluster 2
K68R	1424	SOL	3565.97	1628.91	209.039	0.97806	0.960673	1.16715	1311.5	1687.75	3847.5	-0.0756379	0.147237	-2.91	Cluster 3
T84V	1747	TMD	435.826	175.859	96.7044	0.12007	0.101103	0.536232	371	993	3370.75	-0.199671	1.47832	2.66	Cluster 1
T84N	1756	TMD	433.376	353.601	90.9305	0.118886	0.210752	0.502537	1525	2647.25	2889.25	0.504451	1.4224	3.17	Cluster 1
L85F	1767	TMD	1786.62	783.73	149.013	0.489662	0.46967	0.829672	317.75	463.75	2295.5	-0.116128	0.499861	6.33	Outlier
L89T	1857	TMD	915.515	238.645	98.7033	0.250877	0.14067	0.549252	986	1987.5	4506	-0.636625	0.756537	6.4	Cluster 1
L89P	1863	TMD	436.199	166.395	99.7714	0.118854	0.097287	0.553284	748	1052.75	2281	-0.255845	1.50869	8.88	Cluster 1
L92Q	1927	TMD	624.498	244.633	95.1869	0.170794	0.138902	0.526537	1826.25	2001.5	3035	-0.229301	1.1028	1.54	Cluster 1
M95I	1975	TMD	395.901	273.19	111.362	0.108622	0.162209	0.617342	696.75	582.75	3612.75	0.336892	1.71553	1.25	Cluster 1
M95L	1976	TMD	5498.1	2113.5	217.314	1.5067	1.21126	1.21736	890.5	711.5	4044	-0.248172	-0.246909	-0.53	Outlier
M95V	1978	TMD	421.416	362.897	99.4585	0.115729	0.199979	0.551896	4442	490.25	5704	0.558388	1.54003	1.01	Cluster 1
M95N	1987	TMD	331.076	190.631	93.2501	0.090923	0.111847	0.514586	521	1708.75	2874	0.155878	1.71684	3.25	Cluster 1
D98A	2044	TMD	375.39	219.044	97.1831	0.102643	0.12814	0.535406	1481.25	822.5	3118.75	0.169193	1.63254	-1.64	Cluster 1
D98T	2046	TMD	499.797	173.656	112.387	0.138257	0.100337	0.622707	591.25	727	4830.75	-0.349237	1.49166	-0.48	Cluster 1
V116I	2416	SOL	3173.4	1740.69	235.27	0.870881	1.01117	1.30973	1583.25	424.5	1843.25	0.107363	0.382082	-5.2	Outlier
V116F	2418	SOL	3351.93	1157.5	218.349	0.917221	0.647189	1.22179	1612.25	659.5	3494.25	-0.355384	0.252708	-2.98	Outlier
V116W	2423	SOL	907.307	244.733	119.248	0.248748	0.138541	0.659869	2398.5	265.5	4925.25	-0.602427	0.954629	0.63	Cluster 1
V116H	2429	SOL	312.948	293.855	97.9369	0.085721	0.170645	0.545951	582.5	191.25	2691.75	0.644935	1.82219	1.85	Cluster 1
M132F	2754	TMD	322.86	251.511	88.8937	0.088496	0.145265	0.491142	488	375.5	2005.25	0.458154	1.69413	10.36	Cluster 1
M132G	2762	TMD	569.445	193.261	93.5281	0.155462	0.109521	0.521202	2239.75	881	4067.75	-0.372735	1.17751	1.27	Cluster 1
M132K	2770	TMD	5053.51	1516	280.775	1.38213	0.878248	1.55172	360	298.5	2899.5	-0.496121	0.093621	2.59	Outlier
M132D	2771	TMD	311.122	152.45	105.07	0.085128	0.086954	0.584879	1869.25	790	5525.75	-0.00546622	1.89835	6.79	Cluster 1
L137I	2857	TMD	4468.31	1976.73	263.782	1.22374	1.16923	1.47032	1650.25	921.5	3195.75	-0.107681	0.154265	-1.56	Cluster 3
L137A	2863	TMD	1579.89	212.577	91.7528	0.437222	0.120656	0.509409	206.75	1049	509.75	-1.29792	0.137891	2.62	Cluster 1
L137H	2870	TMD	411.239	156.801	94.9753	0.112832	0.091279	0.526525	2275.75	462.5	1034.5	-0.256313	1.51835	0.63	Cluster 1
L141I	2941	SOL	3878.43	1436.57	215.306	1.06356	0.834551	1.19334	8141	2281.75	15344.5	-0.285285	0.0927793	3.46	Cluster 3
L141F	2943	SOL	4093.35	1543.44	207.538	1.11894	0.886151	1.15043	4962.5	1366.5	10987.2	-0.267461	0.00210324	-0.08	Cluster 3
L141V	2944	SOL	2471.1	567.729	123.123	0.679127	0.330334	0.683354	4011.5	1419	10479	-0.76289	-0.0153282	3.2	Cluster 2
L141A	2947	SOL	3640.03	1662.01	226.516	0.999127	0.975966	1.24847	2700	4528.75	4713.5	-0.0760795	0.206977	7.34	Cluster 3
L141T	2949	SOL	2486.18	919.553	129.957	0.683384	0.532667	0.720672	3418	1798	11625.5	-0.28673	0.0326087	5.21	Cluster 2
L141Y	2950	SOL	3618.99	1316.03	168.714	0.990803	0.759594	0.933978	6233.5	1099.25	7160.5	-0.303686	-0.0818414	-1.83	Cluster 3
L141G	2951	SOL	2554.23	1004.78	157.954	0.698578	0.572333	0.879674	2831.75	2335	9316.75	-0.225095	0.200703	8.19	Outlier
L141S	2952	SOL	3441.9	1091.45	171.775	0.941034	0.648999	0.954145	10752.8	1261.5	5823.25	-0.440626	-0.0136884	6.5	Cluster 3
L141H	2954	SOL	3724.03	1374.38	195.52	1.01835	0.792465	1.09196	13109.2	1229	9187	-0.288916	0.0370071	0.13	Cluster 3
L141P	2955	SOL	630.783	163.009	96.1011	0.172589	0.092658	0.533422	10295	2078	17299.8	-0.64527	1.10235	13.89	Cluster 1
L141Q	2956	SOL	3071.39	1259.36	187.875	0.83984	0.709231	1.04074	5651.75	818	14261.8	-0.18364	0.189797	-2.93	Cluster 3
L141R	2957	SOL	3612.06	2125.26	298.776	0.98557	1.23046	1.65115	5885.75	2750	6695.25	0.177504	0.491568	3.14	Outlier
L141E	2958	SOL	1212.95	209.21	100.383	0.328766	0.121463	0.556313	7624.75	2851	10931	-1.04958	0.49209	2.12	Cluster 1
L141K	2959	SOL	4334.77	2010.62	279.469	1.18514	1.16568	1.54778	4888.75	1238.5	9116.5	-0.0603402	0.242373	0.85	Cluster 3
L141D	2960	SOL	613.631	279.668	109.7	0.169131	0.156468	0.606207	7095	528.5	8554.25	-0.0779043	1.26226	2.54	Cluster 1
A148F	3090	SOL	3176.75	1060.98	182.968	0.869614	0.611901	1.00754	952.5	1180.25	2201.75	-0.388776	0.129603	3.56	Cluster 3
A148M	3093	SOL	2612.86	1494.14	204.589	0.713684	0.862786	1.13126	271.25	497.75	10335.2	0.148993	0.43671	1.88	Outlier
A148T	3096	SOL	3638.17	1525.82	213.767	0.995141	0.887204	1.17896	5541	2490	2753.5	-0.161065	0.149556	2.96	Cluster 3
A148Y	3097	SOL	3604.96	1619.08	224.938	0.987722	0.943475	1.24733	2535.25	824.5	3242.25	-0.0925657	0.209663	3.54	Cluster 3
A148G	3098	SOL	4490.59	1439.55	276.349	1.2288	0.847008	1.53106	5050.5	887	7707.5	-0.429764	0.195832	-0.25	Cluster 3
A148H	3101	SOL	3485.91	1627.63	248.75	0.955961	0.960304	1.38057	2937.5	1103	9764.5	-0.053718	0.343869	2.57	Outlier
A148Q	3103	SOL	3574.31	1463.33	190.764	0.975115	0.843413	1.06571	2628.75	1347.5	3237.25	-0.185169	0.0534165	-1.09	Cluster 3
N152F	3174	SOL	2114.27	494.441	116.159	0.579536	0.286366	0.647506	1612.75	875.75	3399.25	-0.74515	0.0824004	4.11	Cluster 2
N152T	3180	SOL	3135.78	1185.82	164.573	0.858058	0.670532	0.920123	3551.75	577.75	6271	-0.264559	0.0366256	-2.25	Cluster 3
N152Y	3181	SOL	2408	679.564	146.152	0.662141	0.379808	0.813402	2056.75	553	6404	-0.557212	0.182003	0.01	Cluster 2
N152S	3183	SOL	3621.43	1358.25	205.657	0.989914	0.819854	1.13146	6663.5	1124	3240.75	-0.272781	0.115491	3.19	Cluster 3
N152K	3190	SOL	4304.07	1692.53	282.193	1.17629	0.999297	1.55868	778.75	492	1847.25	-0.225451	0.259182	2.38	Cluster 3
N152D	3191	SOL	1908.67	728.092	131.918	0.523435	0.401562	0.728799	1156.75	852	4590	-0.25585	0.311922	5.17	Cluster 2
E156W	3263	SOL	4318.23	2169.97	285.812	1.17838	1.25255	1.60094	1781.25	553.25	1442.75	0.0197557	0.268638	-3.39	Cluster 3
E156S	3267	SOL	4513.73	1932.14	316.969	1.231	1.10546	1.75579	1797	806.5	2485.5	-0.140612	0.327829	-0.46	Outlier
I160H	3353	TMD	583.627	187.557	99.445	0.160585	0.110883	0.54899	3499.5	1209.75	6703.25	-0.427293	1.21425	-2.45	Cluster 1
A163H	3416	TMD	393.514	209.052	118.981	0.108004	0.122346	0.663816	1758	907.5	2270	0.0753517	1.78776	-2.54	Cluster 1
I165A	3451	TMD	2500.78	567.167	140.155	0.685993	0.321672	0.7738	4275.25	252.5	1633	-0.775816	0.102302	2.03	Cluster 2
I165Y	3454	TMD	578.682	718.527	110.334	0.15822	0.404899	0.619972	2407.25	782	4559	0.924335	1.32666	2.64	Outlier
I165G	3455	TMD	3188.97	1194.62	175.752	0.869714	0.696949	0.984275	949.25	813.75	7363.5	-0.273983	0.085526	4.39	Cluster 3
I165H	3458	TMD	531.089	172.703	101.445	0.145514	0.100585	0.559048	4046.5	732.25	4150.25	-0.415471	1.3285	3.91	Cluster 1
I165R	3461	TMD	480.747	330.566	106.843	0.132319	0.191449	0.593454	2074.25	1569	7161	0.333352	1.47993	2.76	Cluster 1
I165E	3462	TMD	842.381	278.342	97.2348	0.229787	0.160407	0.539629	4150.75	354.75	9054.5	-0.399494	0.824802	7.01	Cluster 1
I165D	3464	TMD	428.572	197.917	101.967	0.117742	0.112802	0.565373	2632	720.75	5289.75	-0.0647265	1.5481	6.6	Cluster 1
I168F	3510	TMD	3889.29	1543.96	280.941	1.06517	0.917514	1.55434	2324	643.5	7653	-0.215991	0.35607	8.24	Cluster 3
I168M	3513	TMD	3920.93	1842.24	269.973	1.07416	1.06774	1.49817	2386.25	903	6981.5	-0.0474601	0.308142	8.09	Cluster 3
I168H	3521	TMD	723.514	173.602	97.1152	0.198919	0.100754	0.537935	4063	1703.5	5560.75	-0.719465	0.975684	10.75	Cluster 1
I168Q	3523	TMD	969.844	431.169	92.5584	0.266718	0.238402	0.512043	1113	614.75	4540	-0.10275	0.63461	13.35	Cluster 1
I168E	3525	TMD	524.155	216.727	94.9587	0.143944	0.126093	0.529774	4171.75	624.75	11739	-0.175263	1.27556	13.85	Cluster 1
Q174C	3638	TMD	1200.45	310.771	243.337	0.32975	0.179673	1.36137	1516.5	1034.5	575.75	-0.643508	1.3879	1.49	Outlier
Q174H	3647	TMD	2300.68	1187.97	252.464	0.631776	0.716012	1.40105	3436.75	824.75	3308.25	0.0469287	0.774212	1.35	Outlier
Q174P	3648	TMD	676.052	201.463	172.694	0.184158	0.113524	0.959466	3045.75	1125.25	3391.25	-0.502776	1.61916	7.46	Outlier
Q174E	3651	TMD	2622.89	1732.23	272.398	0.717607	1.0049	1.50508	1453	1423	1267.75	0.293016	0.719138	5.01	Outlier
L175C	3659	TMD	393.962	191.724	105.801	0.107914	0.111041	0.589666	758.25	1113	1401.5	-0.0123099	1.66921	2.29	Cluster 1
I177S	3708	TMD	2075.88	848.344	312.967	0.566767	0.501215	1.73365	1324.75	419	3596.75	-0.18697	1.09186	3.6	Outlier
I177D	3716	TMD	1536.35	511.316	278.296	0.417856	0.284681	1.51202	878.75	244.75	725.5	-0.392286	1.27543	4.65	Outlier
G188K	3946	SOL	2718.69	837.549	219.686	0.746032	0.504411	1.20995	1455.75	628.5	1821	-0.469538	0.468202	1.26	Outlier
V196I	4096	SOL	1915.62	426.366	155.03	0.526392	0.243746	0.855128	2299.5	247.5	3197.75	-0.794611	0.46973	-0.88	Cluster 2
V196M	4101	SOL	3627.78	1636.86	177.17	0.993339	0.978143	0.980262	3886	697.75	11336.8	-0.0879511	-0.0353602	0.47	Cluster 3
V196W	4103	SOL	1384.22	397.696	165.019	0.379881	0.236832	0.909049	2397.75	194	9955	-0.539321	0.857069	7.06	Cluster 2
V196G	4106	SOL	3847.46	2103.19	270.026	1.05786	1.21492	1.49353	1560.5	629.25	8312	0.103929	0.327258	-0.19	Cluster 3
V196Q	4111	SOL	2059.79	423.823	179.336	0.565287	0.245668	0.990955	2000.25	1581.75	2371.25	-0.873157	0.542804	-7.13	Outlier
V196K	4114	SOL	922.091	244.326	155.157	0.254128	0.143105	0.856185	2730.5	1096	5149	-0.620256	1.2017	6.15	Outlier
S200I	4180	SOL	1784.23	683.375	279.501	0.487615	0.412814	1.53887	2537	478.75	997	-0.251809	1.13017	1.32	Outlier
S200C	4184	SOL	749.313	300.371	250.27	0.205324	0.176749	1.37716	491.5	570	1926	-0.20625	1.88729	-2.41	Outlier
S200H	4193	SOL	2093.01	605.691	214.258	0.571497	0.365845	1.19784	1214.75	938.75	425.75	-0.5321	0.704731	-7.91	Outlier
F219I	4579	TMD	788.774	259.202	107.117	0.216625	0.151591	0.594291	3353.25	275.5	2254	-0.404987	0.987345	-3.76	Cluster 1
F219C	4583	TMD	1015	336.287	120.959	0.278033	0.196609	0.665556	737.25	1266.5	12651.5	-0.396795	0.85671	6.59	Cluster 1
F219M	4584	TMD	546.717	328.002	102.993	0.150196	0.185497	0.573846	3726.25	1181.25	2318	0.196975	1.31463	1.92	Cluster 1
F219A	4585	TMD	1295.12	589.575	92.9324	0.356228	0.336243	0.515992	2105.5	754.25	3960.5	-0.0790665	0.349423	3.92	Outlier
F219T	4587	TMD	496.697	1230.04	101.396	0.13653	0.737124	0.564279	1154.5	485	4340.25	1.61471	1.39496	4.85	Outlier
F219G	4589	TMD	516.936	222.835	93.4488	0.141911	0.123535	0.515751	4590.25	732.5	1946.5	-0.133599	1.2734	7.35	Cluster 1
F219H	4592	TMD	1056.01	391.53	99.5641	0.290315	0.224464	0.552132	1932.5	852.5	2997.75	-0.284306	0.622452	4.76	Cluster 1
I221L	4622	TMD	2439.25	830.743	151.717	0.66923	0.488152	0.842431	5580.25	1215.25	7953.5	-0.369238	0.206476	1.97	Outlier
I221V	4624	TMD	3484.39	1542.13	165.762	0.956609	0.912045	0.913988	4324.75	881.5	5050.25	-0.107238	-0.0615904	3.83	Cluster 3
I221C	4625	TMD	2400.47	801.808	123.999	0.659471	0.464164	0.688516	10008.8	432	4762.5	-0.388664	0.0207605	6.21	Cluster 2
I221M	4626	TMD	2863.46	787.958	127.61	0.785613	0.438404	0.710434	7835.75	862.5	12703	-0.582455	-0.126903	0.98	Outlier
I221A	4627	TMD	2903.8	846.31	138.438	0.796828	0.495208	0.773341	2776	558.75	9116.75	-0.525003	-0.0594462	4.75	Outlier
I221W	4628	TMD	938.958	287.489	95.969	0.257859	0.164248	0.533435	10901.2	1080.25	5799.75	-0.475699	0.70316	2.7	Cluster 1
I221T	4629	TMD	1344.08	299.686	99.297	0.370332	0.169994	0.549555	3659.5	1945	12406.5	-0.79284	0.378558	6.5	Cluster 1
I221Y	4630	TMD	459.881	314.032	98.0906	0.125807	0.178696	0.544216	10790.2	317	25425	0.326414	1.43883	3.48	Cluster 1
I221H	4634	TMD	497.118	153.221	97.0799	0.136486	0.087963	0.539492	14813.2	677	15614	-0.469058	1.35061	5.73	Cluster 1
I221P	4635	TMD	525.797	221.946	92.3277	0.144599	0.125886	0.51118	10012.8	883	10354	-0.154592	1.24434	14.23	Cluster 1
I221R	4637	TMD	504.62	586.869	97.9412	0.138359	0.333043	0.540948	11119	1934.5	10027	0.858883	1.34447	4.94	Cluster 1
I221K	4639	TMD	539.494	181.595	103.41	0.148609	0.106022	0.57046	9133.25	867.5	8348.5	-0.380963	1.33198	7.15	Cluster 1
M226I	4726	TMD	4382.92	1598.53	294.481	1.19917	0.894463	1.61829	352.25	492	1259.5	-0.300742	0.28365	-4.66	Cluster 3
M226V	4729	TMD	3714.08	1650.92	292.37	1.01596	0.944013	1.61985	467.75	1442.75	3759.75	-0.102909	0.44204	1.83	Cluster 3
I228M	4773	TMD	2353.8	476.066	115.332	0.642625	0.267174	0.639578	4078.25	280.75	1595	-0.890344	-0.0320687	1.63	Cluster 2
K232W	4859	TMD	1634.12	319.449	114.988	0.449639	0.189423	0.64653	1578.5	394.75	723.5	-0.924378	0.329875	-1.03	Cluster 1
T238K	4996	SOL	3934.9	1413.42	237.327	1.07697	0.813826	1.32443	5043.25	1686	2680	-0.315986	0.175706	1.94	Cluster 3
H242L	5063	SOL	2402.57	657.423	136.246	0.65787	0.385099	0.750333	5309.75	1512.5	6920	-0.588078	0.114076	6.06	Cluster 2
H242F	5064	SOL	2119.31	440.68	116.657	0.582658	0.254254	0.649014	1167.5	659.75	6523.75	-0.86264	0.0842964	2.57	Cluster 2
H242V	5065	SOL	3077.4	1137.31	170.872	0.842936	0.649983	0.951733	4687.5	1074.5	4579	-0.28753	0.0929811	5.25	Cluster 3
H242C	5066	SOL	2964.78	819.414	153.78	0.814069	0.473853	0.857335	4081.5	171.25	4900.5	-0.578083	0.0248728	11.07	Outlier
H242A	5068	SOL	3001.25	789.804	153.311	0.821245	0.472581	0.851928	1379.5	501.5	11189	-0.627114	0.00959223	1.42	Outlier
H242W	5069	SOL	2836.91	1365.62	160.971	0.778509	0.797589	0.893509	2030.75	779.25	9622.75	-0.0232183	0.114661	7.58	Cluster 3
H242T	5070	SOL	3260.71	1134.12	190.13	0.892391	0.667755	1.04701	4236	1117.5	4692.75	-0.348207	0.141913	3.52	Cluster 3
H242S	5073	SOL	3441.08	1070.31	177.14	0.940472	0.611723	0.984882	1916	524.75	6525	-0.45995	0.0173069	2.5	Cluster 3
H242N	5074	SOL	1900.54	1383.89	194.025	0.519186	0.791628	1.07913	888.25	1057.25	11537	0.390647	0.702	3.63	Outlier
H242Q	5077	SOL	3631.51	862.177	192.613	0.995448	0.509265	1.07348	4821	581.5	5377	-0.730057	0.0471824	4.26	Cluster 3
H242R	5078	SOL	3910.28	2016.82	261.673	1.06753	1.15671	1.45637	4478.5	483.75	11706	0.0458001	0.279636	-0.07	Cluster 3
H242E	5079	SOL	3093.7	1378.15	162.049	0.848257	0.794141	0.899556	2144.5	549	6551	-0.100738	0.0346858	4.66	Cluster 3
H242D	5081	SOL	3062.43	1337.36	172.873	0.837925	0.778999	0.962592	2688.25	577.5	9228.75	-0.120629	0.109499	3.42	Cluster 3
R246C	5150	SOL	2861.35	966.114	220.58	0.781594	0.565182	1.21877	10631.8	2019	4694	-0.377882	0.421115	5.83	Outlier
R246W	5153	SOL	2231.88	1001.78	150.508	0.610797	0.591129	0.833761	2305.5	307.75	6037.75	-0.0931765	0.287322	6.68	Outlier
R246Y	5155	SOL	2004.71	756.56	191.221	0.549665	0.448279	1.06353	3179.5	1189.75	13595.2	-0.266589	0.634077	6.3	Outlier
R246H	5159	SOL	3658.04	1343.09	211.076	1.00229	0.782358	1.17055	5356.5	1194	15221.2	-0.294072	0.131442	2.15	Cluster 3
R246P	5160	SOL	2819.62	1179.2	157.628	0.774221	0.686575	0.878088	2854.5	848	7575.25	-0.16388	0.0997859	9.5	Cluster 3
R246D	5165	SOL	3201.51	875.994	188.545	0.881508	0.520655	1.0486	892.75	229.25	5062.75	-0.588133	0.151862	0.97	Cluster 3
L250I	5230	SOL	3483.29	1653.48	215.858	0.95391	0.967955	1.1961	2574.25	724.5	8272.25	-0.0372056	0.202797	-4.25	Cluster 3
L250V	5233	SOL	4104.05	1734.22	212.798	1.12358	1.01766	1.17302	4443.25	569.25	8361	-0.153529	0.0245208	-1.72	Cluster 3
L250H	5243	SOL	4181.16	1314.03	226.636	1.14404	0.775631	1.25575	6943	1098.75	11225.8	-0.449608	0.0689055	-4.73	Cluster 3
L250Q	5245	SOL	3676.12	1487.89	213.13	1.00927	0.844499	1.18307	1953.75	915.75	13762.2	-0.196612	0.136195	-1.57	Cluster 3
L250E	5247	SOL	4139.37	1760.28	220.519	1.13332	1.03659	1.23063	4304	420.5	7125	-0.147184	0.05159	-1.28	Cluster 3
K254L	5315	SOL	3780.17	1659.44	219.596	1.03508	0.995736	1.2244	6851	1138.75	5286.25	-0.115404	0.138171	2.29	Cluster 3
K254A	5320	SOL	4476.88	1431.12	216.857	1.22389	0.827225	1.21118	675.25	1732.25	4226.5	-0.432582	-0.0435386	5.8	Cluster 3
K254W	5321	SOL	3117.46	1083.11	236.424	0.849832	0.633537	1.30988	396.5	573.5	3843	-0.349296	0.404761	0.9	Outlier
K254H	5327	SOL	3924.51	1691.26	223.136	1.07092	0.97547	1.23822	1901.5	654.25	6436	-0.133884	0.11669	5.65	Cluster 3
K254P	5328	SOL	3396.74	1315.24	209.846	0.934611	0.766269	1.15529	348.25	1577	7804.5	-0.240908	0.19971	10.84	Cluster 3
K254Q	5329	SOL	2665.84	1237.53	218.963	0.72766	0.733766	1.21795	957.5	1098	9701.25	-0.0595164	0.484533	1.89	Outlier
K254R	5330	SOL	3709.52	1524.79	235.656	1.01646	0.851119	1.30062	2565.25	458.75	6076	-0.181157	0.227621	1.96	Cluster 3
K254E	5331	SOL	3013.15	817.067	154.066	0.825656	0.468913	0.863167	4637	446.25	4820.75	-0.597134	0.0105437	3.54	Outlier
L262I	5482	SOL	3804.26	1415.24	246.952	1.04022	0.824453	1.37906	1000.5	378.25	4059.75	-0.280933	0.24922	-2.89	Cluster 3
L262W	5489	SOL	1160.3	322.187	101.792	0.317888	0.185085	0.567934	2519.5	1490	4487	-0.573415	0.550398	0.64	Cluster 1
L262T	5490	SOL	1796.03	474.644	118.134	0.49429	0.283045	0.655741	2046.75	489	1312	-0.622885	0.262387	-2.52	Cluster 2
L262N	5494	SOL	1119.44	368.22	103.482	0.307971	0.220554	0.574141	1723.5	391.75	3566.5	-0.404022	0.602715	3.34	Cluster 1
L262Q	5497	SOL	3390.23	1378.33	168.406	0.929306	0.807387	0.93131	2156.5	835.75	3923	-0.192137	-0.018369	-2.13	Cluster 3
L262R	5498	SOL	3793.69	1829.59	236.669	1.03883	1.06847	1.30774	2880	2250.5	5079.25	-0.0213594	0.209475	-1.82	Cluster 3
K266I	5566	SOL	1733.74	514.235	137.955	0.473728	0.289309	0.763924	2452.25	143.25	6440.75	-0.507472	0.452794	-0.87	Cluster 2
K266F	5568	SOL	1982.81	480.104	136.976	0.544222	0.278235	0.769048	1863	1309	3564.5	-0.710383	0.311443	2.46	Cluster 2
K266C	5570	SOL	1932.15	634.366	113.732	0.531035	0.364194	0.630469	1929.75	1228.5	5453.25	-0.405874	0.151363	6.42	Cluster 2
K266M	5571	SOL	1998	631.826	162.422	0.547279	0.364992	0.898897	3146.5	564.5	9790.75	-0.443401	0.474201	-1.15	Cluster 2
K266A	5572	SOL	951.616	317.361	107.014	0.262012	0.181848	0.592736	2815.5	299.5	8174.25	-0.390235	0.798701	4.51	Cluster 1
K266W	5573	SOL	2344.23	655.959	142.346	0.642374	0.378744	0.791488	1860.5	1991.25	6709.25	-0.565727	0.182455	1.34	Cluster 2
K266T	5574	SOL	1620.34	708.546	114.65	0.444957	0.428317	0.63318	3726	1013.5	2073.5	-0.11929	0.335399	4.26	Cluster 2
K266S	5577	SOL	1227.18	264.4	102.218	0.337357	0.153308	0.567159	1265.5	1068	11485.8	-0.827122	0.498545	5.03	Cluster 1
K266Q	5581	SOL	4564.64	1989.78	276.541	1.24788	1.14422	1.53082	2448.25	1196.5	4926.25	-0.122428	0.180171	4.57	Cluster 3
K266R	5582	SOL	2984.56	927.174	160.828	0.818395	0.536879	0.88901	4301.5	838.25	4095.25	-0.46118	0.0630345	1.79	Outlier
F271C	5675	TMD	1481.05	355.922	100.443	0.407267	0.208881	0.554786	4282.75	543.5	4053	-0.717907	0.292987	1.8	Cluster 1
F271M	5676	TMD	4037.87	1851.03	303.753	1.10864	1.06222	1.67599	816.5	779.5	2543.5	-0.0720871	0.396649	-4.14	Cluster 3
F271W	5678	TMD	322.131	144.098	95.7218	0.088321	0.082604	0.530677	1329.5	511.25	2122	-0.0965812	1.77039	-5	Cluster 1
F271T	5679	TMD	827.401	199.079	96.5449	0.22836	0.115797	0.537067	1055.75	1311.5	5134.5	-0.716702	0.835624	-0.06	Cluster 1
F271P	5685	TMD	319.254	184.753	96.2467	0.087741	0.104622	0.533414	10154.2	348	5239.25	0.160919	1.78483	0.3	Cluster 1
F271D	5690	TMD	472.222	211.695	93.6106	0.130136	0.117449	0.519157	1652.5	1136	7504.25	-0.094414	1.3656	2.12	Cluster 1
L285M	5970	TMD	4397.96	1513.59	154.573	1.20358	0.877903	0.85004	2397.75	273.5	537.75	-0.358768	-0.364326	-4.49	Outlier
L285Q	5980	TMD	2523.18	870.684	149.931	0.694124	0.513477	0.838386	1024.25	452.5	3017	-0.356111	0.160808	0.22	Outlier
L285K	5983	TMD	2355.77	630.573	170.03	0.643868	0.378413	0.958702	1117.25	1083.75	1333	-0.610108	0.355255	1.85	Outlier
V303Y	6352	SOL	1944.96	1078.07	111.655	0.531893	0.621464	0.62431	3301	229.75	833.5	0.117814	0.126318	2.91	Outlier
F310D	6509	TMD	320.613	244.523	114.764	0.087876	0.139605	0.646057	511.5	415.25	637.75	0.43696	1.95655	4.6	Cluster 1
F317V	6640	TMD	4047.26	1241.72	157.327	1.11198	0.708537	0.871405	871.25	954.25	3976.75	-0.473654	-0.263564	-2.5	Cluster 3
F317A	6643	TMD	1925.85	542.357	127.883	0.52861	0.322381	0.717047	3790.25	744.75	1652.75	-0.55931	0.271901	1.1	Cluster 2
F317T	6645	TMD	4140.12	1953.72	230.251	1.13275	1.14484	1.26669	2676	1185.75	2071	-0.0431029	0.0945941	2.47	Cluster 3
F317G	6647	TMD	638.539	194.753	101.409	0.175587	0.112054	0.562852	4105.5	595	3558	-0.479566	1.14389	3.1	Cluster 1
F317S	6648	TMD	2604.68	823.015	181.214	0.715372	0.47149	1.00901	2368	656.75	3756.25	-0.444206	0.318518	3.52	Outlier
D318A	6664	TMD	4426.84	1490.82	140.63	1.21028	0.89247	0.781103	2800	491.75	4527.75	-0.380472	-0.465402	-1.83	Outlier
D318T	6666	TMD	4600.84	2054.49	285.397	1.25999	1.19542	1.57915	2981.25	573	2189.5	-0.0983219	0.203792	2.37	Cluster 3
D318Y	6667	TMD	1872.11	1040.3	95.2888	0.51483	0.606217	0.533221	4639.75	1603.5	2264.5	0.12033	0.00599446	6.71	Outlier
D318H	6671	TMD	2328.32	510.09	101.972	0.638455	0.282487	0.56337	5323.25	1053.25	4690	-0.810428	-0.144294	2.23	Cluster 2
D318E	6675	TMD	570.917	162.644	96.7108	0.156117	0.093575	0.538701	1518	1497.75	2420.25	-0.547795	1.20839	0.95	Cluster 1
L320I	6700	TMD	3231.47	877.393	184.191	0.885533	0.493787	1.0214	5386.5	639.5	8001	-0.595851	0.119187	0.41	Cluster 3
L320V	6703	TMD	4001.42	1291.61	177.376	1.0942	0.752205	0.979201	1109.5	630	7189.75	-0.422876	-0.132226	-0.61	Cluster 3
L320S	6711	TMD	551.071	237.556	96.4688	0.151802	0.131772	0.535801	7150	1050.75	7923.5	-0.133572	1.24126	4.55	Cluster 1
L320H	6713	TMD	635.298	413.499	95.3236	0.174179	0.244144	0.526505	7953.75	1104.75	3824.5	0.278448	1.08709	6.71	Cluster 1
L320R	6716	TMD	446.148	157.111	100.688	0.121975	0.089792	0.55622	3454.5	999	3890.75	-0.335813	1.49528	-1.69	Cluster 1
L320K	6718	TMD	615.84	308.721	99.1388	0.169061	0.185092	0.550383	3360	1810	1934.5	0.017339	1.15744	1.87	Cluster 1
Y322F	6744	TMD	1967.18	492.121	103.053	0.540874	0.290324	0.570314	1411	551.75	6839.5	-0.677742	0.0347932	-0.83	Cluster 2
Y322H	6755	TMD	1386.5	340.988	127.433	0.379367	0.189251	0.697144	3103.5	534.75	2142	-0.694805	0.596955	2.43	Cluster 1

## Sheet: Union_high_quality_n=1339
variant	idx	tm_res	WT_intensity	V276T_intensity	W107A_intensity	WT_score_norm	V276T_score_norm	W107A_score_norm	WT_counts_avg	V276T_counts_avg	W107A_counts_avg	V276T_epistasis_ε	W107A_epistasis_ε	WT_Rosetta_DDG
N4I	64	SOL	1481.53		135.137	0.403666		0.742064	514.25		1921.25		0.589364
N4L	65	SOL	1096.9		146.835	0.299189		0.820112	1140.25		1507		0.972974
N4F	66	SOL	1470.86	697.792	115.587	0.402455	0.391569	0.635744	642.5	1618.75	926.75	-0.0377978	0.440322
N4V	67	SOL	1413.23	1201.17	126.65	0.385642	0.660796	0.697986	910.25	750.25	1560.75	0.545304	0.571695
N4C	68	SOL	1301.41		94.0233	0.35631		0.521827	2538.5		2008.25		0.356242
N4M	69	SOL	1222.47		121.002	0.335148		0.669543	1047		2000		0.67108
N4A	70	SOL			134.399			0.735139			470.25
N4W	71	SOL	1147.96		109.374	0.314863		0.606756	801.5		4290.75		0.632935
N4T	72	SOL	1693.75		171.949	0.461355		0.920645	3132.5		316.5		0.696401
N4Y	73	SOL	1812.47	783.931	117.484	0.498744	0.468367	0.65313	103	418	2167.5	-0.130237	0.24776
N4G	74	SOL	1776.04		121.905	0.486496		0.684181	1011.5		1670.75		0.305003
N4S	75	SOL		584.73	137.94		0.330551	0.769833		493.5	3590.5
N4H	77	SOL	1013.89	448.21	116.535	0.278456	0.259193	0.649567	619.5	760	4468.5	-0.108404	0.820543
N4P	78	SOL			121.857			0.672385			2119.25
N4Q	79	SOL	1150.29		129.986	0.314811		0.722233	2100.75		2037.5		0.80356
N4R	80	SOL	834.145		114.742	0.229204		0.639079	2898.5		3448.25		1.00018
N4E	81	SOL			131.381			0.730232			4357.5
N4K	82	SOL	713.303	296.395	121.278	0.195092	0.173222	0.677148	1074.5	596.5	3473.25	-0.170327	1.21208
N4D	83	SOL	1656.41		136.007	0.45598		0.756812	790		3318.5		0.484202
E8L	149	SOL	5110.12		242.724	1.39648		1.37039	566.25		761		-0.0631485
E8V	151	SOL	2212.23		231.212	0.596228		1.28378	197.25		935.5		0.725488
E8C	152	SOL	879.29		192.593	0.240798		1.08007	1800		1822.25		1.46537
E8M	153	SOL	4244.5			1.16339			2939.75
E8A	154	SOL	4355.45		230.369	1.18889		1.28571	1536.5		2594.25		0.0444025
E8W	155	SOL	3996.51		160.881	1.08949		0.903712	1614		3123.5		-0.228605
E8Y	157	SOL			207.782			1.15069			3852.75
E8G	158	SOL	1930.65			0.52536			308.75
E8N	160	SOL	3947.54		203.228	1.07898		1.12831	460.5		1018.25		0.0173874
E8H	161	SOL	4488.54	1485.71		1.22868	0.871603		609.25	508.75		-0.39775
E8Q	163	SOL	4357.41	1622.18	241.73	1.18712	0.940164	1.34362	1275	1207.5	2756	-0.28022	0.0920953
E8K	166	SOL	2873.37		220.708	0.786105		1.22432	700.75		3430.25		0.417503
E8D	167	SOL	3116.57		242.794	0.851279		1.35721	879.75		1734.75		0.431631
N12L	233	SOL	3757.72	633.296	199.948	1.02577	0.345395	1.0992	705.25	585	5883	-1.07274	0.050394
N12V	235	SOL	3543.05	995.484	243.505	0.968175	0.589195	1.3466	2698.75	545.5	6068.75	-0.561628	0.3063
N12A	238	SOL	3998		220.996	1.09711		1.23369	1906		401		0.0885002
N12T	240	SOL	4208.9		218.216	1.15294		1.20583	1093		6432.75		0.0244352
N12G	242	SOL	3521.44		183.59	0.965412		1.02593	2775.5		4934		0.0299886
N12S	243	SOL	4592.39		229.185	1.25579		1.27852	4724.75		5592.25		-0.0137192
N12H	245	SOL	3859.71		226.919	1.05645		1.2597	2427		4896.5		0.150152
N12P	246	SOL	3356.59	1305.94	224.904	0.919088	0.748861	1.24299	1006.5	1620.75	1800.5	-0.236116	0.280899
N12Q	247	SOL	3893.94		174.95	1.06769		0.974197	5804		8252.75		-0.118769
N12R	248	SOL	4399.55		242.323	1.20721		1.34278	677		6043.75		0.08492
N12E	249	SOL	3707.71		188.09	1.01734		1.04682	688.75		10137.5		0.00265657
N12K	250	SOL	3284.18	1505.82	221.509	0.901161	0.884026	1.2279	2715	393.25	10122.2	-0.071896	0.287497
N12D	251	SOL	3499.95	1271.7	190.145	0.960703	0.773092	1.0443	1370	984.5	4073	-0.30451	0.0711859
A16I	316	SOL	3982.56		245.364	1.08968		1.36128	3746.25		10616.5		0.196968	1.43
A16L	317	SOL	3997.63		262.319	1.09296		1.44807	1854.25		8332.75		0.260008	-5.91
A16F	318	SOL	4150.54	1651.98	270.392	1.1346	0.934557	1.49858	3505.5	1822.25	8440.5	-0.213374	0.252784	0.43
A16V	319	SOL	3660.27		234.999	1.00489		1.30154	3133.5		8393		0.238196	-3.15
A16C	320	SOL	1418.72		277.516	0.389451		1.53723	2889.5		6369.25		1.35227	3.24
A16M	321	SOL	4559.4		259.448	1.24705		1.43964	2534.75		3579.5		0.117515	0.36
A16W	323	SOL	4214.69		266.613	1.153		1.46449	1848.25		8282.5		0.22337	-0.97
A16T	324	SOL	4021.11	1554.92	266.243	1.09855	0.919213	1.47285	8403	1599	13779	-0.242244	0.269002	-0.84
A16Y	325	SOL	4085.47	1655.09	246.858	1.11385	0.941342	1.37531	4135.5	343.25	9269	-0.195695	0.177527	-0.87
A16G	326	SOL	4345.11	1785.69	287.031	1.18748	1.05626	1.58474	7666.5	1306.5	12882.2	-0.18136	0.266692	-1.72
A16S	327	SOL	4458.64	1657.6	267.991	1.2181	0.963464	1.48247	5898	1179.25	6160.25	-0.281588	0.172261	-5.66
A16N	328	SOL	4136.41	1440.87	273.872	1.1336	0.789414	1.51884	7732.5	1076	13994.8	-0.346694	0.268983	-1.16
A16H	329	SOL	3672.99	1314.9	263.769	1.00312	0.762975	1.46841	5082.75	982	4024.25	-0.319356	0.350219	-0.1
A16P	330	SOL	3104.25		233.907	0.848012		1.2867	6911.25		11094.2		0.398302	0.18
A16Q	331	SOL	3500.19	1270.56	279.315	0.955185	0.717394	1.55265	4183.75	507.25	9969.25	-0.305474	0.455675	-2.32
A16R	332	SOL	3310.33	1452.15	240.677	0.90443	0.843876	1.33282	7291	778	8090.75	-0.116114	0.362559	-1.59
A16E	333	SOL	3868.69		256.654	1.05882		1.42641	7570.75		11070		0.270964	-0.25
A16K	334	SOL	4311.68		271.63	1.1799		1.49559	3082.75		7618.75		0.219263	-0.24
A16D	335	SOL	3941.82	1557.51	266.899	1.07786	0.928875	1.47464	6858.75	3239	14037	-0.220668	0.291381	-4.4
S20I	400	SOL	1703.65	574.92	251.325	0.465518	0.327289	1.39481	5164.5	144.25	10440.2	-0.378414	1.07012	1.98
S20L	401	SOL	1624.29		159.892	0.443471		0.914635	1769.5		196.25		0.665578	4.25
S20F	402	SOL	1471.42		290.631	0.401525		1.61155	643.25		4682.75		1.36198	0.64
S20V	403	SOL	1732.84			0.471618			252					1.46
S20C	404	SOL	653.91	305.741	171.103	0.179027	0.174977	0.945891	12011.8	2451.75	9766.25	-0.0523435	1.6432	1.27
S20M	405	SOL	1564.36	800.6	236.612	0.426503	0.454494	1.3104	3951.75	809.5	7341.5	0.038019	1.0951	0.4
S20A	406	SOL	1772.52		195.044	0.485087		1.08178	3814.75		13555.8		0.776976	-3.1
S20W	407	SOL	1834.97	786.561	279.624	0.50139	0.465541	1.54672	6233.75	2006.25	6101.25	-0.139227	1.10257	6.23
S20T	408	SOL	3577.1	1342.68	203.52	0.97781	0.759239	1.13229	5186	436.5	8881.5	-0.271999	0.11736	-0.64
S20Y	409	SOL	1897.98		209.806	0.51724		1.16132	1908		3339.5		0.781545	0.95
S20G	410	SOL	2776.13	1810.5	214.819	0.758985	1.05777	1.1887	4716.25	1202.5	14413.2	0.28043	0.424886	3.97
S20N	412	SOL	1860.7	586.577	159.955	0.509728	0.327571	0.888405	4611.25	327.5	12773.8	-0.446516	0.530094	0.73
S20H	413	SOL	1749.54	462.194	163.572	0.480677	0.265705	0.903195	2846.5	350.25	5715.5	-0.623236	0.614052	1.42
S20P	414	SOL	739.085		199.649	0.202777		1.11227	408.75		3597.25		1.67505	-1.03
S20R	416	SOL	1528.97	846.828	145.253	0.418006	0.521014	0.803556	8932.75	259.75	12186.2	0.117032	0.630031	-1.23
S20K	418	SOL	1270.26	1105.73	139.737	0.348233	0.688437	0.775597	1721.75	704.25	9316.25	0.569166	0.776686	0.48
S20D	419	SOL	1315.2	421.339	125.875	0.360274	0.248951	0.700867	159.75	1138.5	9192.25	-0.430417	0.637454	3.17
I24L	485	SOL	4000.44	1686.79	234.778	1.09292	1.00172	1.30226	237	619	2803	-0.155689	0.148387	-2.91
I24V	487	SOL			243.778			1.32826			497			-2.64
I24C	488	SOL	611.324		161.712	0.167489		0.873308	494.25		826.25		1.65409	-0.91
I24M	489	SOL	4050.25	1485.1	215.788	1.11088	0.832476	1.19765	1713.5	511.25	3016.5	-0.29541	0.0516678	-1.96
I24A	490	SOL			189.673			1.04891			852.5			-1.95
I24W	491	SOL			204.477			1.12678			2657.5			-2.18
I24T	492	SOL	2271.49		195.027	0.625304		1.07766	566		2260.25		0.528854	-1.85
I24G	494	SOL			193.184			1.07809			1759			-1.24
I24S	495	SOL	2522.97			0.690615			2673.75					-0.87
I24N	496	SOL	2914.52		199.379	0.800702		1.11202	2043.75		1931.25		0.301651	-4.17
I24H	497	SOL	3514.82		200.323	0.964157		1.1159	551.5		1092.75		0.119092	-8.32
I24P	498	SOL	3549.05		197.05	0.968341		1.09822	795.25		787.5		0.0929272	-2.93
I24Q	499	SOL		1075.39	185.846		0.595342	1.04019		1028.5	2154			-2.21
I24R	500	SOL	2407.94	1138.06	164.872	0.658644	0.631517	0.92628	5184	279.75	1982.25	-0.0415585	0.302547	-3.42
I24E	501	SOL	2770.19		174.089	0.759664		0.954222	414.75		629.75		0.216801	-4.16
I24K	502	SOL			143.162			0.790358			1594			-4.7
I24D	503	SOL			221.227			1.22409			1139.75			-0.71
L28I	568	SOL	3763.33		253.637	1.02827		1.40177	3460		510		0.28675	-0.15
L28F	570	SOL	3556.48	887.233		0.973245	0.498365		799	599.75		-0.680533		2.87
L28V	571	SOL			197.811			1.08292			617.25			3.23
L28M	573	SOL	4007.33		231.888	1.09609		1.28992	3294.75		2890.75		0.13428	2.48
L28A	574	SOL	3049.75	501.172		0.834824	0.30275		1234.25	137.75		-1.09798		5.46
L28T	576	SOL	2322.82		208.434	0.638014		1.15507	746.25		5092.75		0.57299	2.84
L28Y	577	SOL	3216.9	1083.53	229.179	0.881933	0.673206	1.26186	1728.25	207	1297	-0.380304	0.342233	-0.59
L28G	578	SOL	1996.31		267.397	0.545444		1.46972	460.25		949		0.973581	3.78
L28N	580	SOL	2427.79	443.016	245.155	0.667923	0.247741	1.35801	825	344.25	4199.25	-0.993242	0.691061	-1.31
L28H	581	SOL	1121.91	740.858	208.29	0.305992	0.409239	1.15436	12.5	823.75	4323.25	0.292905	1.30005	-1.41
L28P	582	SOL	2031.31	1066.87		0.560165	0.589956		153	1061		0.0639328		3.11
L28Q	583	SOL	3099.34		228.761	0.853716		1.26161	580.75		1596.25		0.37764	2.14
L28R	584	SOL	1967.62	599.541	174.005	0.540311	0.365874	0.975981	2719	256	809.5	-0.480527	0.55841	0.92
L28E	585	SOL	3025.96		202.005	0.832153		1.11908	2530		848.75		0.277214	1.57
L28K	586	SOL	1753.25		147.364	0.48192		0.818683	1364.75		791.75		0.507582	2.32
L28D	587	SOL	1993.63	610.404	216.097	0.546578	0.358393	1.20044	483	554.25	770.5	-0.475707	0.761921	3.93
T32I	652	SOL	511.122	471.485	151.192	0.140217	0.245746	0.840103	4223.5	1456	14255	0.627165	1.76585	2.46
T32L	653	SOL	647.597		130.885	0.178111		0.720889	456		5487.75		1.38496	0.8
T32F	654	SOL	887.417		136.846	0.240145		0.757414	918		5725		1.11445	2.33
T32V	655	SOL	554.193	443.435	190.19	0.151778	0.266804	1.06154	2163.5	2628	3403.5	0.484926	1.91442	3.01
T32C	656	SOL	497.07		118.138	0.136263		0.657362	2412		5143		1.54703	3.36
T32M	657	SOL	1126.9		148.548	0.307043		0.824559	1056		3078		0.957585	1.31
T32A	658	SOL	1302.89	321.98	166.318	0.356449	0.187957	0.925658	6128.75	930.5	7319	-0.689963	0.92547	-1.04
T32W	659	SOL		171.759	120.959		0.100525	0.668886		2111.75	5038			0.11
T32Y	661	SOL	531.96	282.751	144.003	0.146258	0.165615	0.797897	2257	1804	8063.5	0.075886	1.67717	1.94
T32G	662	SOL	2321.3		207.656	0.633546		1.15625	1309		7248		0.56991	-0.83
T32S	663	SOL	3735.65	1708.19	198.359	1.02198	0.999067	1.10684	5475.5	894	9519.75	-0.0746012	0.0483086	-3.38
T32N	664	SOL	2237.84	802.27	196.55	0.613705	0.466179	1.08759	1386.5	1487	11341	-0.317935	0.551557	-0.05
T32H	665	SOL	1273.59	418.394	200.739	0.350214	0.248322	1.12021	8466.25	352.25	13270.8	-0.405282	1.13632	1.7
T32P	666	SOL	773.198	359.946	160.058	0.212692	0.199859	0.883777	2279.5	732.25	7297.75	-0.0566957	1.40891	-2.99
T32Q	667	SOL	1970.75	447.751	234.668	0.536886	0.256912	1.30892	46	235.5	2409	-0.774044	0.855911	-2.63
T32R	668	SOL	1031.31		225.592	0.283239		1.26032	3346.75		5207		1.46405	-3.92
T32E	669	SOL	1220.75	469.742	159.012	0.335398	0.272867	0.883054	109.75	133	6009	-0.24715	0.945663	0.68
T32K	670	SOL	784.412		211.078	0.214697		1.17766	1855.25		3722.5		1.6712	-4.5
T32D	671	SOL	1238.46		201.814	0.340302		1.11222	471		11760.2		1.16963	-4.48
K36I	736	SOL	4309.55		238.285	1.17811		1.32295	1548.25		1732.25		0.0887877	-0.32
K36L	737	SOL	2897.81		190.826	0.798485		1.04748	467.75		559.25		0.263554	-1.66
K36F	738	SOL	2246.77		200.37	0.613224		1.11386	1556.5		799.25		0.566822	-3.49
K36V	739	SOL	2453.03		209.223	0.674926		1.15244	2247.25		1594.75		0.522226	-0.54
K36C	740	SOL			174.78			0.973108			2708.5			5.21
K36M	741	SOL	2803.25		202.752	0.765885		1.12381	2598		4030.5		0.357354	-0.41
K36A	742	SOL	1783.67		212.456	0.49093		1.17758	1328.25		2170		0.856215	1.97
K36W	743	SOL	2564.58		271.482	0.704874		1.5132	976.25		3093.5		0.738252	0.98
K36T	744	SOL	2160.18		189.291	0.592689		1.04351	2370		1342		0.549248	2.54
K36Y	745	SOL	3183.59			0.870001			924.5					4.59
K36G	746	SOL	1262	481.429	215.867	0.343952	0.275485	1.1755	897.75	1807	343.5	-0.255812	1.21811	1.55
K36S	747	SOL	1332.12		203.34	0.366379		1.12519	3244.75		3017.25		1.10426	0
K36N	748	SOL	832.771		139.613	0.228294		0.771587	1881		243		1.19802	-0.78
K36H	749	SOL			133.514			0.746613			1499			2.03
K36P	750	SOL	1012.11			0.279822			924.25					-4.02
K36Q	751	SOL	1848.1	453.894	136.887	0.505705	0.259074	0.759222	802	95	1145	-0.696162	0.381153	-1.5
K36R	752	SOL	3376.45	383.434	233.969	0.925129	0.201999	1.28082	3525.5	732.5	1918	-1.46752	0.314517	-0.91
K36E	753	SOL	544.107	697.737	128.753	0.149138	0.411117	0.707751	259	618.5	2787.5	0.956583	1.54266	2.6
K36D	755	SOL			118.494			0.653699			2035.25			0.17
T40I	820	TMD	3372.04		190.971	0.922728		1.05991	3235.25		7181		0.112751	-4.61
T40L	821	TMD	2132.19	942.408	198.617	0.586679	0.550572	1.12321	1110.75	2112.75	876	-0.10858	0.610376	-4.64
T40F	822	TMD	2483.1		203.232	0.679255		1.13657	2939		550.5		0.480988	-2.49
T40V	823	TMD	3999.79		208.728	1.09563		1.16002	815.25		1938.75		0.0309415	0.97
T40C	824	TMD	2847.1		230.214	0.779859		1.28146	704.25		5635		0.468858	-1.88
T40M	825	TMD	2677.53		239.656	0.730722		1.32698	1576.75		382.25		0.570461	-1.5
T40A	826	TMD	4568.72		261.171	1.25155		1.44461	2015.75		7585.5		0.122093	-1.49
T40W	827	TMD			177.587			0.991573			1979.5			-5.28
T40Y	829	TMD	2026.33		167.857	0.555793		0.926374	3537.5		6421.5		0.493037	1.03
T40G	830	TMD	3459.65		245.691	0.94564		1.33748	2817.5		2676.75		0.339059	2.45
T40S	831	TMD			213.999			1.17758			2826.75			-0.47
T40N	832	TMD	428.734	509.757	117.269	0.117726	0.318655	0.652717	2494.5	1292	4649.5	0.880985	1.68754	-0.59
T40P	834	TMD	891.716		156.069	0.241338		0.867748	985.25		6678.25		1.24106	6.32
T40Q	835	TMD	453.484		115.936	0.124683		0.64226	2018.25		1038		1.61998	0.9
T40R	836	TMD			144.51			0.810195			2139.25			3.96
T40K	838	TMD	369.62		113.116	0.101566		0.628587	1189.75		1622.75		1.79984	0.96
T40D	839	TMD	709.333	496.551	138.884	0.193411	0.300407	0.77212	1218	274.25	1144.25	0.351249	1.35322	4.36
T42I	862	TMD	865.364	167.047	105.459	0.237454	0.09605	0.579322	4140	1059	7361.25	-0.936989	0.879075	0.74
T42F	864	TMD	785.172	143.381	99.0375	0.213248	0.0830583	0.547067	4575.75	752.5	5751.25	-0.99251	0.913501	-1.96
T42V	865	TMD	1120.78		101.614	0.307388		0.564185	811.25		5714		0.58331	-2.61
T42C	866	TMD	2656.43	567.797	130.602	0.727799	0.331661	0.721853	3329.5	951.5	6589.75	-0.835088	-0.0286754	3.23
T42M	867	TMD	1183	201.84	105.488	0.324048	0.117875	0.58318	4426	191.25	6266.5	-1.06045	0.566695	-0.88
T42A	868	TMD	1378.06		129.797	0.380047		0.717936	3304.5		4628.5		0.621445	4.07
T42W	869	TMD	1018.03		98.3882	0.280023		0.543851	1448.25		7554.75		0.6472	-2.19
T42G	872	TMD	1957.36		128.729	0.536336		0.725797	169.5		1476.25		0.262262	3.71
T42S	873	TMD	1828.39	565.256	144.864	0.502313	0.336698	0.810528	2499.5	408.75	6395.25	-0.466027	0.448511	3.71
T42N	874	TMD	873.857	203.068	120.131	0.241451	0.117058	0.669939	5907	481.5	8917.5	-0.751488	0.999574	3.17
T42P	876	TMD	373.472		100.915	0.102625		0.564274	3118		8054.25		1.67534	6.77
T42Q	877	TMD	2872.27		162.401	0.787644		0.899163	1411.75		5216.75		0.111118	2.89
T42R	878	TMD	413.119	173.939	99.6838	0.113709	0.0963765	0.553007	3291.25	586	5276.5	-0.157146	1.56217	2.31
T42E	879	TMD	4129.67	1525.99	251.976	1.13134	0.918523	1.40125	4410	652.75	3107	-0.287669	0.187287	3.01
T42K	880	TMD	380.796	184.807	96.4098	0.104882	0.108021	0.534238	3934.25	400	10687.5	-0.0150633	1.61025	4.45
F44I	904	TMD	4375.62	1438.96	301.514	1.20117	0.807862	1.66869	5217	1715.25	9005.5	-0.404241	0.30892	-5.75
F44L	905	TMD	4781.51	1697.47	254.919	1.30907	0.993239	1.41468	1682.75	729.25	4973.75	-0.327733	0.0523408	-0.71
F44V	907	TMD	4772.7	1642.07	296.582	1.30828	0.985441	1.63909	7356.75	1285.5	4228	-0.359068	0.205561	-6.06
F44C	908	TMD	4549.46		281.282	1.24476		1.56191	11841.8		11039.5		0.200502	1.26
F44M	909	TMD	4414.83		281.938	1.20683		1.5553	2811.25		5797		0.23287	-2.68
F44A	910	TMD	4512.69		260.93	1.23565		1.43892	4889.5		8733		0.133509	0.7
F44W	911	TMD	823.298	320.857	120.975	0.226162	0.175233	0.670003	8794.25	400.75	11792.5	-0.234437	1.06617	-0.54
F44T	912	TMD	4265.91	1609.91	262.341	1.16786	0.921292	1.46201	6723	669	9347.5	-0.26659	0.195141	-2.2
F44Y	913	TMD	768.774	244.822	115.985	0.210518	0.140713	0.643602	8690.5	1147.75	7602.5	-0.436378	1.09257	-2.12
F44G	914	TMD	4347.46	1535	253.087	1.18909	0.90245	1.40132	5957.75	918.25	6576.75	-0.333175	0.140293	0.59
F44S	915	TMD	2412.87	779.237	209.297	0.663162	0.452556	1.16405	4420.75	749.75	9504.75	-0.42237	0.539087	1.91
F44N	916	TMD	729.499	318.527	96.8229	0.200253	0.187705	0.538708	6427	3437.25	12203.5	-0.120764	0.96443	2.32
F44H	917	TMD	1195.12		102.339	0.331447		0.567525	4108.25		13999.2		0.526191	2.07
F44P	918	TMD	754.408	294.76	101.557	0.207156	0.175135	0.564554	4148.25	389.75	11587.8	-0.231886	0.978592	4.23
F44Q	919	TMD	603.588		99.1758	0.164895		0.551874	865.25		11245.8		1.17791	1.3
F44R	920	TMD	382.711	245.195	94.6786	0.104715	0.139461	0.524432	3022.75	1577	8832.5	0.262663	1.58711	0.6
F44E	921	TMD	561.796		101.679	0.153086		0.566781	6723		13535.2		1.27458	3.22
F44K	922	TMD	423.697	273.154	101.226	0.116712	0.158045	0.55724	2483.75	1102.75	5239.5	0.268904	1.55224	4.12
F44D	923	TMD	550.921	157.552	92.721	0.151043	0.0896792	0.514518	6244.5	843.75	18593.8	-0.543951	1.20191	4.33
S49F	1011	TMD	529.325		96.2682	0.144431		0.5305	641.75		1796.75		1.27944	19.21
S49V	1012	TMD	245.195		122.638	0.0673742		0.698768	215.75		548.5		2.29109	11.04
S49C	1013	TMD	499.61		106.491	0.137152		0.587785	1592.75		3920.25		1.43814	9.31
S49M	1014	TMD	644.544			0.177359			1531.75					10.76
S49A	1015	TMD	943.772		105.345	0.256921		0.581953	2341.75		632.5		0.791266	5.07
S49T	1017	TMD			105.131			0.580469			2057.25			5.84
S49Y	1018	TMD	375.599		99.2756	0.102853		0.549564	561		2140.75		1.65328	11.3
S49G	1019	TMD	4966.73		200.808	1.35921		1.11738	1337.75		3067.75		-0.224263	2.63
S49N	1021	TMD	1278.42	182.826	103.448	0.354054	0.10631	0.571544	2602.75	788.25	699.25	-1.23696	0.469594	8.79
S49P	1023	TMD		1166.22	92.667		0.738189	0.516743		1400.75	1676			9.92
S49R	1025	TMD			111.453			0.621995			1648.25			8.35
S49E	1026	TMD	352.953		94.7778	0.0965103		0.52622	816		7937.25		1.66911	3.84
S49K	1027	TMD			118.966			0.660217			1565.75			12.42
S49D	1028	TMD	318.434		128.274	0.0874531		0.719228	2201.25		803.5		2.07466	9.52
A51I	1051	TMD			252.763			1.4076			2386.5			-4.58
A51L	1052	TMD			236.36			1.32029			1063.25			-5.74
A51F	1053	TMD	2999.5			0.818377			600.5					-2.3
A51V	1054	TMD	3512.72		227.314	0.961115		1.26747	676		2085.75		0.246094	-2.79
A51C	1055	TMD			196.584			1.10939			1330.75			2.95
A51W	1058	TMD			222.228			1.22511			2013.75			0.83
A51T	1059	TMD			257.728			1.4368			1519.25			-0.06
A51Y	1060	TMD			257.469			1.41972			2437.25			0.05
A51G	1061	TMD	3640.32		215.427	0.996498		1.20143	1818		3070.5		0.156702	0.65
A51S	1062	TMD	3740.84		196.48	1.02188		1.08745	512.75		1261.25		0.0374014	1.38
A51H	1064	TMD	1668.65		122.644	0.456044		0.681982	771.75		616		0.373427	3.12
A51P	1065	TMD			93.5688			0.52138			1277			6.9
A51R	1067	TMD	2021.25			0.55756			386.5					1.19
A51E	1068	TMD	725.205		95.4676	0.199429		0.529687	266.25		1565		0.956239	5.07
A51D	1070	TMD	562.771	397.696	93.4043	0.155934	0.23751	0.522519	978	630.75	3229.75	0.360701	1.18797	7.57
N53I	1093	TMD			102.493			0.56621			3862.25			4.96
N53L	1094	TMD	536.084		95.9637	0.147166		0.523018	2639.75		949.75		1.26358	-2.33
N53F	1095	TMD	614.004			0.168636			1063.25					14.3
N53V	1096	TMD			95.4144			0.532513			1515.75			3.21
N53C	1097	TMD	799.244		92.7287	0.220684		0.516332	1652		788.25		0.829918	3.06
N53M	1098	TMD	364.862		92.8236	0.100395		0.514623	640		1864.5		1.61509	10.14
N53A	1099	TMD	375.741		137.946	0.102941		0.768744	1074.75		1454.75		1.98187	3.1
N53W	1100	TMD	1651.43		114.936	0.455234		0.634119	484.5		422.25		0.318888	10.05
N53T	1101	TMD	280.914	228.547	95.058	0.0770393	0.138484	0.526803	2439.5	491.5	3538.75	0.501581	1.90035	0.94
N53Y	1102	TMD	908.919	203.661	98.3848	0.252355	0.116712	0.54741	2050.25	378.75	10669.2	-0.78791	0.760536	11.65
N53G	1103	TMD	627.151		97.9688	0.169718		0.540721	1977.25		1284.75		1.12737	6.38
N53S	1104	TMD	613.743		91.1533	0.168706		0.503802	5851.75		8501		1.07687	4.01
N53H	1106	TMD			89.576			0.500117			1714.75			2.16
N53Q	1108	TMD			116.095			0.64282			1779.25			0.63
N53R	1109	TMD	296.24		95.7001	0.081305		0.52868	1628.75		5242.75		1.85396	7.6
N53E	1110	TMD	404.554		98.2055	0.110488		0.545825	1618.75		4861.75		1.56818	4.54
N53K	1111	TMD	362.797	213.273	102.195	0.0989555	0.125751	0.567685	1348.75	562.75	6197.75	0.176618	1.71694	5.74
N53D	1112	TMD	619.47		95.3096	0.169108		0.532553	3169.25		4742.5		1.11217	6.51
T64I	1324	SOL	2104.4	609.056	131.968	0.578994	0.353672	0.735057	2860.5	531	8685.5	-0.531989	0.214681	4.37
T64F	1326	SOL			109.482			0.606253			3367.25			0.35
T64V	1327	SOL			94.973			0.527621			2991			6.66
T64C	1328	SOL			184.24			1.02616			3095.75			6.11
T64M	1329	SOL			106.959			0.591202			4967.5			5.53
T64A	1330	SOL	2833.37		156.717	0.778838		0.86744	1254.75		2745.5		0.0891287	4.24
T64W	1331	SOL			100.012			0.557946			4757.5			4.2
T64G	1334	SOL	2829.56	790.495	202.34	0.765679	0.443498	1.12032	851	455.5	8396.25	-0.567331	0.345976	5.13
T64S	1335	SOL			189.594			1.05663			2212.75			3.1
T64N	1336	SOL	4171.53		196.175	1.13984		1.08938	761.25		4727.75		-0.0731253	0.48
T64P	1338	SOL	2916.57		144.981	0.801128		0.804925	1726.5		4599.25		-0.0176546	5.91
T64Q	1339	SOL	2616.03		173.067	0.718174		0.97581	440		2074		0.26817	6.02
T64R	1340	SOL	1689.58		121.58	0.46259		0.677433	2071.5		5237		0.352239	-0.39
T64E	1341	SOL	2005.17		176.859	0.545366		0.982402	385.75		3046		0.555775	2.79
T64K	1342	SOL	1857.22		137.168	0.51209		0.756785	341.75		7081.25		0.378278	0.53
K68I	1408	SOL	2088.81		116.137	0.577979		0.642342	1014.25		2093.75		0.0943228	5.87
K68L	1409	SOL			122.978			0.679711			1128.25			4.36
K68F	1410	SOL			101.006			0.562921			2015.5			5.91
K68V	1411	SOL	1907.95		120.993	0.525763		0.674738	580.5		2160.5		0.225856	2.99
K68C	1412	SOL	1794.45		105.051	0.492981		0.584814	1578.5		3076		0.145897	7.25
K68M	1413	SOL	1723.55		113.795	0.474714		0.632486	1063.5		2979.75		0.266163	0.84
K68A	1414	SOL	2950.37		135.073	0.810032		0.754123	1619.5		3495.5		-0.0999682	3.69
K68W	1415	SOL	591.325	214.678		0.162171	0.124432		605.5	841.75		-0.30534		2.18
K68T	1416	SOL			161.38			0.901242			3844			1.18
K68G	1418	SOL	2670.69			0.729825			2364.5					4.16
K68S	1419	SOL	3904.74		179.672	1.07004		0.990683	2020.5		3216.25		-0.0949069	4.19
K68N	1420	SOL	4236.42		163.501	1.15827		0.908711	2536.75		1568.75		-0.270748	3.86
K68H	1421	SOL		729.844	159.533		0.419412	0.896101		812.25	2032.75			6.33
K68R	1424	SOL	3565.97	1628.91	209.039	0.97806	0.960673	1.16715	1311.5	1687.75	3847.5	-0.0756379	0.147237	-2.91
K68E	1425	SOL	1913.16		124.923	0.526151		0.694015	1584.5		4701.5		0.255092	-0.2
K68D	1427	SOL			116.846			0.652777			1800			1.41
K72I	1492	SOL	1116.35			0.30556			1327.75					3.46
K72L	1493	SOL	779.856		97.4775	0.214876		0.545188	513		2408		0.904418	0.72
K72V	1495	SOL			108.361			0.601454			2693.75			2.92
K72M	1497	SOL	1060.95		96.617	0.290849		0.537657	2309.5		3772.5		0.587738	0.55
K72G	1502	SOL	3245.1	1161.81		0.884743	0.661914		737.25	875.25		-0.319281		2.99
K72S	1503	SOL	4218.55		271.869	1.15601		1.5015	1222.5		1129		0.241979	0.03
K72N	1504	SOL	3457.45			0.947389			2660.5					3.76
K72Q	1507	SOL	3383.79	935.265	169.683	0.932164	0.548585	0.936953	287	555.25	866.5	-0.578036	-0.00891522	1.17
K72E	1509	SOL			313.757			1.73583			1016.75			1.4
M76I	1576	SOL	635.275		95.1094	0.174567		0.529215	955		3103.75		1.08488	-1.53
M76L	1577	SOL			89.3847			0.495091			2151.25			-1.34
M76F	1578	SOL			310.129			1.71425			760.75			-10.67
M76V	1579	SOL		539.718	93.3384		0.335799	0.519318		2239.75	2078.75			0.58
M76A	1582	SOL			97.0059			0.541697			1567.25			5.52
M76W	1583	SOL	4386.15		277.708	1.19806		1.54018	1365		1549.25		0.224269	-6.25
M76T	1584	SOL		200.182	97.7096		0.114777	0.541249		709.25	969.25			4.71
M76Y	1585	SOL			279.475			1.54899			1839.25			-5.75
M76G	1586	SOL			88.7328			0.48916			1965.5			6.64
M76S	1587	SOL			99.1284			0.548168			3934			4.04
M76N	1588	SOL	1280.9		96.8295	0.346567		0.536185	441.5		4596		0.401537	5.41
M76P	1590	SOL			94.7474			0.527965			3126.25			7.85
M76Q	1591	SOL	1310.55	356.9	176.867	0.362662	0.196994	0.946543	1097.25	508.75	69.25	-0.592858	0.981102	3.14
M76R	1592	SOL	500.888		100.179	0.13662		0.560375	627.5		2505.5		1.37448	1.91
M76E	1593	SOL			94.3599			0.527954			1337.25			4.26
M76K	1594	SOL	1400.73		101.748	0.379141		0.566276	1062		1818		0.361656	3.56
T84I	1744	TMD	373.509		91.6238	0.102372		0.506953	1275.75		8405.75		1.57865	3.38
T84F	1746	TMD	1076.24			0.294727			986					1.86
T84V	1747	TMD	435.826	175.859	96.7044	0.12007	0.101103	0.536232	371	993	3370.75	-0.199671	1.47832	2.66
T84C	1748	TMD			138.709			0.75372			1953.75			-1.29
T84M	1749	TMD	776.39		114.406	0.213664		0.624706	684.25		1416.5		1.06901	6.99
T84A	1750	TMD	833.179		96.7604	0.230048		0.534629	1793.75		4694		0.830895	-5.15
T84W	1751	TMD			102.91			0.575192			3188.75			5.24
T84Y	1753	TMD	1320.9		110.267	0.364115		0.605382	150.75		2407.25		0.500742	6.85
T84G	1754	TMD	502.109		89.1012	0.138176		0.490819	2129.75		2152		1.25486	2.87
T84S	1755	TMD	831.584		94.2126	0.227909		0.5272	3676.5		2270.5		0.806127	-1.73
T84N	1756	TMD	433.376	353.601	90.9305	0.118886	0.210752	0.502537	1525	2647.25	2889.25	0.504451	1.4224	3.17
T84H	1757	TMD			93.4909			0.51687			2753.5			-1.67
T84P	1758	TMD	305.637		100.796	0.0835923		0.55626	700.25		5345		1.87461	13.86
T84R	1760	TMD		198.549	97.0329		0.113062	0.541573		547.25	1159.75			2.58
T84E	1761	TMD			100.216			0.555746			859.5			9.1
T84K	1762	TMD	531.382		94.2179	0.144795		0.519125	539		563		1.25404	8.06
T84D	1763	TMD	823.07		92.082	0.226222		0.505153	1106.5		944		0.793543	10.75
L85I	1765	TMD	5112.79	1944.01		1.40072	1.13441		374.25	579.75		-0.259106		1.13
L85F	1767	TMD	1786.62	783.73	149.013	0.489662	0.46967	0.829672	317.75	463.75	2295.5	-0.116128	0.499861	6.33
L85C	1769	TMD	2236.07		129.933	0.618622		0.724435	632.5		1755.25		0.138451	9.16
L85M	1770	TMD		1338.95	192.346		0.806491	1.0807		683.5	1476			-1.78
L85A	1771	TMD	4090.49		193.303	1.12156		1.081	655.75		3730.75		-0.0682545	6.19
L85W	1772	TMD	3387.84		154.745	0.935362		0.882566	628.5		991.75		-0.102262	3.83
L85T	1773	TMD			119.298			0.652226			447.75			4.97
L85Y	1774	TMD	4319.11		166.932	1.18422		0.93077	911.5		1621.5		-0.269312	4.62
L85N	1777	TMD			95.9943			0.530777			2514.75			4.23
L85H	1778	TMD	414.441			0.113302			636.75					8.5
L85P	1779	TMD	317.581		97.1369	0.087472		0.541639	894.5		470.75		1.79929	14.35
L85R	1781	TMD	508.084		97.4743	0.13861		0.5337	2273.5		2379.5		1.33285	8.1
L85K	1783	TMD			93.3048			0.515796			358			6.94
L85D	1784	TMD	1769.98		92.088	0.493893		0.509133	1034.75		2675		0.02793	4.24
L89I	1849	TMD	3080.89	719.607	142.927	0.852516	0.411908	0.80079	207	644	1683.5	-0.746382	-0.0867318	3.73
L89F	1851	TMD	2414.68		105.162	0.661849		0.584167	1884		2739.5		-0.149911	4.95
L89V	1852	TMD	1338.49		109.316	0.367238		0.608069	879.5		3738		0.478855	4.6
L89M	1854	TMD	2085.75		127.378	0.572235		0.708753	2016		13250		0.188179	1.34
L89A	1855	TMD	1696.65		110.117	0.465055		0.612032	3066.5		2062		0.249036	2.65
L89W	1856	TMD	453.647		89.3856	0.125		0.495103	4302.5		2499.5		1.35954	1.86
L89T	1857	TMD	915.515	238.645	98.7033	0.250877	0.14067	0.549252	986	1987.5	4506	-0.636625	0.756537	6.4
L89Y	1858	TMD	343.683		100.132	0.094165		0.55699	4057.25		7564.25		1.75067	5.72
L89S	1860	TMD	623.521		88.953	0.171272		0.491184	891.25		1663.75		1.03663	8.24
L89H	1862	TMD	469.605	297.834	100.625	0.129677	0.158455	0.55636	599	1217.5	7394	0.25253	1.44342	5
L89P	1863	TMD	436.199	166.395	99.7714	0.118854	0.0972866	0.553284	748	1052.75	2281	-0.255845	1.50869	8.88
L89Q	1864	TMD	411.377		103.878	0.112703		0.585244	3462		3755		1.60761	5.55
L89R	1865	TMD			100.566			0.55904			4394			7.66
L89E	1866	TMD	398.611		93.4703	0.108911		0.51807	4002.5		4113.5		1.53356	11.37
L89K	1867	TMD	658.262		94.5397	0.181297		0.525389	1618		3042.75		1.04332	3.94
L89D	1868	TMD	695.54		114.622	0.187876		0.632145	789		2851		1.18085	7.59
L92I	1912	TMD			204.353			1.13957			745.75			1.69
L92F	1914	TMD			105.88			0.585798			4008.25			2.71
L92V	1915	TMD	4513.79	1272.39	213.555	1.23301	0.674023	1.18694	2815.5	406.5	2823.75	-0.558356	-0.0670944	2.74
L92M	1917	TMD	3751.75		137.106	1.02803		0.762343	3529.25		4361.25		-0.325317	-0.47
L92A	1918	TMD	2771.71		96.0886	0.760948		0.528801	470		693.75		-0.378045	5.6
L92W	1919	TMD	3255.2		178.066	0.89341		0.983656	1267		2572.25		0.0780503	6.31
L92T	1920	TMD	3687.81	705.221	111.403	1.01027	0.373752	0.621979	657.25	1057	2045.75	-0.94639	-0.515732	5.04
L92Y	1921	TMD	604.587		91.2449	0.167262		0.503994	2514.5		5094.5		1.09291	5.1
L92G	1922	TMD			101.231			0.5598			1076			8.68
L92S	1923	TMD			98.8126			0.546067			4811			6.01
L92N	1924	TMD			96.8888			0.53459			392			1.7
L92H	1925	TMD		150.933	103.1		0.0862976	0.568839		491.75	4721.25			6.87
L92P	1926	TMD	649.623		92.1878	0.179683		0.514828	3583.25		1067.25		1.03134	12
L92Q	1927	TMD	624.498	244.634	95.1869	0.170794	0.138902	0.526537	1826.25	2001.5	3035	-0.229301	1.1028	1.54
L92R	1928	TMD	419.558		109.919	0.114674		0.608598	4163.75		4794.25		1.64445	2.34
L92E	1929	TMD	492.349		99.3989	0.134965		0.553629	1546.5		5166.25		1.38386	5.19
L92K	1930	TMD	338.501		89.2543	0.0926673		0.495348	2674.75		1843.75		1.65087	7.32
L92D	1931	TMD			96.3655			0.537085			1711.75			5.56
M95I	1975	TMD	395.9	273.19	111.362	0.108622	0.162209	0.617342	696.75	582.75	3612.75	0.336892	1.71553	1.25
M95L	1976	TMD	5498.1	2113.5	217.314	1.5067	1.21126	1.21736	890.5	711.5	4044	-0.248172	-0.246909	-0.53
M95V	1978	TMD	421.416	362.898	99.4585	0.115729	0.199979	0.551896	4442	490.25	5704	0.558388	1.54003	1.01
M95A	1981	TMD	381.171			0.104132			446.75					2.87
M95W	1982	TMD	397.798		94.0741	0.109547		0.523994	745.75		4887.5		1.54205	-0.73
M95T	1983	TMD	297.132			0.0815547			2886.25					5.44
M95Y	1984	TMD	402.55		97.6415	0.110805		0.536021	620.75		366		1.56739	4.96
M95S	1986	TMD	1217.86		91.8196	0.334163		0.5068	1355.75		1481		0.398882	4.55
M95N	1987	TMD	331.076	190.631	93.2501	0.0909229	0.111847	0.514586	521	1708.75	2874	0.155878	1.71684	3.25
M95H	1988	TMD	397.789	720.279		0.108811	0.462328		1462.5	175.75		1.3016		-0.25
M95P	1989	TMD	1095.4		187.088	0.298002		1.01051	1048.5		367.25		1.21661	10.35
M95Q	1990	TMD	353.494		94.0083	0.096837		0.530406	3764.5		947.75		1.65942	1.97
M95R	1991	TMD		381.453	106.031		0.209894	0.594626		582.25	4432.25			2.6
M95E	1992	TMD	339.845		89.8084	0.0934184		0.497515	2229.25		3810		1.65309	5.71
M95K	1993	TMD	1149.13		94.1617	0.314136		0.522389	5177		4130.5		0.482161	2.94
M95D	1994	TMD	546.516		93.0745	0.148108		0.519468	1825.25		1771		1.21374	5.64
D98V	2041	TMD			99.218			0.552525			2191			-5.24
D98C	2042	TMD		242.711	106.71		0.143704	0.594405		553.25	1198			-1.58
D98A	2044	TMD	375.39	219.044	97.1831	0.102643	0.12814	0.535406	1481.25	822.5	3118.75	0.169193	1.63254	-1.64
D98W	2045	TMD			90.6878			0.504521			2301			-1.51
D98T	2046	TMD	499.797	173.656	112.387	0.138257	0.100337	0.622707	591.25	727	4830.75	-0.349237	1.49166	-0.48
D98Y	2047	TMD	759.827			0.210258			232.5					-0.77
D98G	2048	TMD	436.398		108.645	0.119875		0.597494	2738.5		1381.25		1.59343	2.76
D98S	2049	TMD	515.529		103.369	0.141591		0.577373	2915.25		2115.75		1.37702	-1.72
D98N	2050	TMD	490.559		122.164	0.134767		0.683305	1310.5		742.5		1.59372	-0.44
D98H	2051	TMD			123.296			0.683993			3546.75			-3.83
D98P	2052	TMD			91.8458			0.506955			1664.25			4.87
D98Q	2053	TMD	557.835		107.823	0.153177		0.599346	488.5		1260.5		1.34033	-2.04
D98E	2055	TMD	1978.05		171.46	0.537589		0.957656	778		7201.25		0.538389	-3.53
D98K	2056	TMD	385.2		98.2101	0.10481		0.543849	443		840.5		1.61725	2.04
V105G	2195	SOL	4678.7			1.28109			287.75					-6.9
V105N	2197	SOL	1583.39			0.434239			474.75					-9.24
V105R	2201	SOL	3032.16			0.829588			688.75					0.87
Q106W	2213	SOL	3681.64			1.00837			457.75					-0.57
Q106E	2223	SOL		568.406			0.344331			710.75				0.27
Y108F	2250	SOL	2264.92			0.620738			1311.75					1.65
Y108C	2252	SOL	462.683			0.127502			919.75					1.57
Y108H	2261	SOL		1084.9			0.63994			160.25				0.41
Y108P	2262	SOL	555.24			0.152198			2385.25					1.91
Y108E	2265	SOL	1109.97	295.691		0.304933	0.16852		1713.75	1516		-0.614888		-0.4
Y108D	2267	SOL	681.518			0.18694			243.5					-0.35
A109I	2269	SOL		1073.9			0.633371			741				-0.7
A109F	2271	SOL	1356.09			0.37031			1030.5					3.48
A109G	2279	SOL	3502.5	1680.15		0.952991	0.968146		826.5	921.75		-0.0267074		0.52
A109P	2283	SOL	630.789			0.172197			561.75					-0.77
A109Q	2284	SOL	550.508			0.150291			1247.75					1.8
F112V	2335	SOL	3928.18			1.0761			1755					-3.67
F112C	2336	SOL	1083.67			0.297102			855					-0.36
F112M	2337	SOL	2820.18			0.771516			361.75					-0.11
F112A	2338	SOL	2982.85			0.819355			1853.25					-0.29
F112W	2339	SOL	1825.22			0.501457			516.75					-2.77
F112T	2340	SOL	2497.69			0.684058			916					-1.95
F112Y	2341	SOL	1125.18			0.310159			698.5					-0.04
F112G	2342	SOL	1224.55			0.338202			1299.5					0.71
F112S	2343	SOL	878.432			0.241104			1621.5					1.74
F112N	2344	SOL	1100.74			0.300097			1270.25					-3.24
F112H	2345	SOL	1212.13			0.331836			2694.75					0.85
F112P	2346	SOL	1089.03	326.432		0.299311	0.188015		1374	816.5		-0.49693		3.13
F112Q	2347	SOL	635.13			0.175103			760.25					-4.03
F112R	2348	SOL	439.492			0.120718			636					-1.93
F112D	2351	SOL	363.05			0.0995841			280					1.36
V116I	2416	SOL	3173.4	1740.69	235.27	0.870881	1.01117	1.30972	1583.25	424.5	1843.25	0.107363	0.382082	-5.2
V116L	2417	SOL		1828.56	236.796		1.04781	1.31714		1419	3761.5			-4.9
V116F	2418	SOL	3351.93	1157.5	218.349	0.917221	0.647189	1.22179	1612.25	659.5	3494.25	-0.355384	0.252708	-2.98
V116C	2420	SOL	1690.47		121.669	0.465845		0.678381	1176.75		3034.25		0.35245	-0.53
V116M	2421	SOL	2307.61		169.979	0.632137		0.940396	884.75		6539		0.375616	-1.36
V116A	2422	SOL	2646.64		150.78	0.726746		0.838672	3135.25		3678.25		0.118682	-0.47
V116W	2423	SOL	907.307	244.733	119.248	0.248748	0.138541	0.659869	2398.5	265.5	4925.25	-0.602427	0.954629	0.63
V116T	2424	SOL	3352.24		141.465	0.913484		0.78321	1332		2971		-0.181425	-1.5
V116Y	2425	SOL	656.565		94.5812	0.179301		0.527562	2278		6082.5		1.04634	-0.47
V116G	2426	SOL	1561.85		125.155	0.428412		0.69673	1970.75		5581.25		0.459835	-2.51
V116S	2427	SOL	1166.79		114.28	0.320607		0.640273	1989.75		1737.75		0.660544	-0.63
V116N	2428	SOL	430.464		166.985	0.118528		0.90486	806.75		446		2.03694	0.54
V116H	2429	SOL	312.948	293.855	97.9369	0.0857215	0.170645	0.545951	582.5	191.25	2691.75	0.644935	1.82219	1.85
V116P	2430	SOL	355.304		93.7939	0.0969984		0.525877	696		255		1.65203	9.95
V116Q	2431	SOL	309.261		94.0377	0.0850587		0.521601	1663.25		2878		1.79342	3.4
V116R	2432	SOL	323.757		100.463	0.0886429		0.558925	1000.75		3806		1.8137	-1.62
V116E	2433	SOL			95.1519			0.524316			2175.25			2.08
V116K	2434	SOL	4066.76		96.8878	1.11191		0.536633	533		4170.75		-0.753142	-0.57
V116D	2435	SOL	417.591	270.309	94.0612	0.114542	0.146467	0.524055	1679.5	308	6161.25	0.272948	1.49335	5.2
L120I	2500	TMD			96.0843			0.530129			1468.5			2.05
L120V	2503	TMD			106.953			0.591641			958.5			3.24
L120M	2505	TMD	2273.23	529.334	125.198	0.630092	0.296993	0.692974	581.75	676.25	2180.25	-0.749449	0.084846	2.4
L120A	2506	TMD			107.23			0.589927			1669.75			3.11
L120W	2507	TMD		225.355			0.130949			435.25				1
L120Y	2509	TMD			91.6715			0.508104			2945.75			3.4
L120G	2510	TMD	462.842			0.126875			672.75					7.47
L120S	2511	TMD	679.555		98.0285	0.188039		0.544083	716.25		725.75		1.04773	3.49
L120H	2513	TMD	371.73		101.276	0.102137		0.565996	3235.75		3597.75		1.68359	5.57
L120P	2514	TMD			103.804			0.579334			1148.25			18.98
L120Q	2515	TMD	455.768		100.943	0.12591		0.560336	169.5		1827.25		1.47648	4.55
L120R	2516	TMD	327.093		91.884	0.0893933		0.513186	1011		866.25		1.71419	3.16
L120K	2518	TMD			96.6116			0.536555			6267			0.9
A129I	2689	TMD			92.4459			0.517117			1724.75			-5.25
A129F	2691	TMD	519.187			0.143219			501					-1.97
A129V	2692	TMD			122.807			0.666423			998.75			-3.19
A129M	2694	TMD			94.356			0.520394			872.25			-11
A129W	2696	TMD			90.4532			0.503425			959.25			-6.33
A129T	2697	TMD	4563.99		252.847	1.25059		1.41504	656.25		293		0.0907379	0.46
A129Y	2698	TMD			98.7488			0.550354			1922			-0.47
A129G	2699	TMD	2472.58		115.179	0.679143		0.646868	276.5		1101.75		-0.0826266	2.12
A129N	2701	TMD	5261.26		305.373	1.44018		1.68859	169.25		417.25		0.137312	-1.34
A129H	2702	TMD			94.3881			0.525308			675			-6.07
A129P	2703	TMD		258.06	99.4096		0.149622	0.552292		1320.75	1424.5			1.3
A129Q	2704	TMD			97.5286			0.541848			3632.25			-2.43
A129R	2705	TMD		674.365	109.93		0.399213	0.608269		746.75	1263			-1.84
A129K	2707	TMD			98.7672			0.546451			967.25			-7.79
A129D	2708	TMD	558.296		89.6033	0.152378		0.505019	867.5		1071.5		1.15441	2.32
F130I	2710	TMD	379.306			0.103931			2207.5					-1.69
F130L	2711	TMD	1571.92		118.963	0.433633		0.665407	2186.5		261.75		0.402661	-0.22
F130V	2713	TMD			93.7573			0.520592			6039.75			1.56
F130C	2714	TMD	321.595	1115.19	95.7973	0.0882451	0.636697	0.527113	357.5	636.25	1273.5	1.95137	1.77285	2.71
F130A	2716	TMD	400.49		94.8828	0.110338		0.52595	474.75		2650.25		1.54386	4.02
F130W	2717	TMD		1581.07	299.35		0.926088	1.67034		691.25	610.75			0.39
F130T	2718	TMD	355.345		98.9639	0.09719		0.546806	1709.5		1901.25		1.70557	4.63
F130Y	2719	TMD			273.943			1.52584			1351.75			2.68
F130G	2720	TMD	292.125		89.3887	0.0801086		0.499	822.75		772		1.79972	2.32
F130S	2721	TMD	375.902			0.103236			897.75					4.66
F130N	2722	TMD	2326.92		174.056	0.639993		0.978317	2517.75		704.5		0.390981	2.94
F130H	2723	TMD			114.883			0.629252			896.75			4.61
F130P	2724	TMD	318.567			0.0873655			743.75					10.57
F130Q	2725	TMD			108.332			0.597802			553.5			4.91
F130R	2726	TMD	430.831		97.2335	0.117131		0.535121	908.75		2164.5		1.49531	-2.17
F130E	2727	TMD	515.932		90.4488	0.141688		0.499344	1124.25		1383		1.24271	4.72
F130K	2728	TMD	330.835		91.6598	0.0907495		0.507102	441.5		2085		1.70037	0.41
F130D	2729	TMD	566.313	276.093		0.153711	0.158974		2124.25	972.5		-0.0105218		8.59
M132I	2752	TMD	1358.45		106.278	0.373749		0.584202	4092.5		3640		0.435863	5.29
M132L	2753	TMD	4417.07		132.809	1.20623		0.739496	1546.5		1027.25		-0.520417	2.32
M132F	2754	TMD	322.86	251.511	88.8937	0.0884965	0.145265	0.491142	488	375.5	2005.25	0.458154	1.69413	10.36
M132V	2755	TMD	1112.83		94.8942	0.30785		0.527731	1892.5		4600.75		0.522007	0.85
M132A	2758	TMD	521.296		81.7834	0.142621		0.45749	543.25		339.5		1.13166	4.25
M132W	2759	TMD			94.6006			0.523431			2466.25			10.45
M132T	2760	TMD	2574.18	1027.48	125.969	0.708189	0.583116	0.705783	280.75	1902	3497.25	-0.210538	-0.0333456	5.78
M132Y	2761	TMD	428.452		102.428	0.116998		0.568051	1537		4096.5		1.55289	10.63
M132G	2762	TMD	569.445	193.261	93.5281	0.155462	0.109521	0.521202	2239.75	881	4067.75	-0.372735	1.17751	1.27
M132S	2763	TMD	552.018		101.744	0.152031		0.566852	4736.75		6153.5		1.29279	3.64
M132N	2764	TMD	4227.98		296.375	1.15814		1.62649	1910.5		3558.25		0.326049	5.85
M132P	2766	TMD	661.239	277.857	94.0013	0.182978	0.169027	0.520106	1835	676.25	3897	-0.159123	1.0331	15.65
M132Q	2767	TMD	1367.16	381.856	98.9951	0.37428	0.217059	0.548259	1621.25	348.25	1443.5	-0.567558	0.358489	4.45
M132R	2768	TMD	4339.54		316.467	1.18589		1.75927	1748.5		3334.25		0.365603	2.68
M132E	2769	TMD	500.555		93.9121	0.13745		0.520754	2015		5303.5		1.31055	5.47
M132K	2770	TMD	5053.51	1516	280.775	1.38213	0.878248	1.55172	360	298.5	2899.5	-0.496121	0.093621	2.59
M132D	2771	TMD	311.122	152.45	105.07	0.0851284	0.0869539	0.584879	1869.25	790	5525.75	-0.00546622	1.89835	6.79
S136I	2836	TMD		259.632	95.7086		0.142699	0.53165		292.5	2770.25			-5.31
S136L	2837	TMD	1517.31		91.1782	0.41503		0.51082	2514.5		1866		0.172031	1.96
S136F	2838	TMD			92.2716			0.513314			2500.25			-5.24
S136V	2839	TMD	1875.71		113.935	0.513771		0.632755	2611.5		4723		0.182787	-4.4
S136C	2840	TMD		1459.84	259.158		0.872393	1.42147		1560.75	3588.5			-0.83
S136M	2841	TMD	950.041		108.755	0.260942		0.606449	713.25		1292.5		0.816502	-4.27
S136A	2842	TMD	960.102		103.724	0.262068		0.585896	1301		683		0.758597	-0.77
S136W	2843	TMD	433.336		85.7127	0.118138		0.472651	1058.25		1910		1.36339	-2.6
S136T	2844	TMD	937.175		103.258	0.2559		0.571785	1728.5		3703.5		0.778263	-4.93
S136Y	2845	TMD			94.2514			0.522503			2086.25			-7.98
S136G	2846	TMD			104.751			0.576349			4504.5			2.71
S136N	2848	TMD	1112.42		93.3387	0.302692		0.517409	2251		2830.5		0.505847	-0.43
S136H	2849	TMD	782.624		94.9897	0.214699		0.521646	2372.25		856.25		0.875022	-6.58
S136P	2850	TMD	373.709		106.247	0.102223		0.590805	2113.5		2065.25		1.7262	4.2
S136K	2854	TMD			97.8476			0.541102			3353.5			1.79
S136D	2855	TMD	731.376		97.9152	0.199505		0.540004	3398.25		2191		0.97308	0.16
L137I	2857	TMD	4468.31	1976.73	263.782	1.22374	1.16923	1.47031	1650.25	921.5	3195.75	-0.107681	0.154265	-1.56
L137M	2862	TMD	1823.52		136.678	0.501065		0.768337	988.5		3285		0.393008	0.19
L137A	2863	TMD	1579.89	212.576	91.7528	0.437222	0.120656	0.509409	206.75	1049	509.75	-1.29792	0.137891	2.62
L137W	2864	TMD		337.925	102.489		0.20382	0.57105		893.5	1656.25			-0.36
L137T	2865	TMD	425.767		89.3614	0.117016		0.496028	2055		1611.75		1.4227	0.2
L137Y	2866	TMD		830.474			0.47334			565.5				0.22
L137G	2867	TMD	286.535		96.0676	0.0785288		0.534548	1088.75		2324		1.8911	2.16
L137S	2868	TMD	504.853		82.4049	0.139111		0.457137	495.75		1184.25		1.17128	1.28
L137N	2869	TMD	2183.21		93.3893	0.589944		0.515614	571.75		2716.75		-0.167869	-0.54
L137H	2870	TMD	411.239	156.801	94.9753	0.112832	0.0912793	0.526525	2275.75	462.5	1034.5	-0.256313	1.51835	0.63
L137P	2871	TMD			90.2521			0.499094			513.75			12.03
L137Q	2872	TMD	828.607	248.194	91.9958	0.223616	0.145021	0.510833	732.25	186.25	5445.25	-0.49765	0.785902	-1.16
L137K	2875	TMD	550.946		98.5921	0.150487		0.551296	3207.5		695.5		1.26326	0.06
L141I	2941	SOL	3878.43	1436.57	215.306	1.06356	0.834551	1.19334	8141	2281.75	15344.5	-0.285285	0.0927793	3.46
L141F	2943	SOL	4093.35	1543.44	207.538	1.11894	0.886151	1.15043	4962.5	1366.5	10987.2	-0.267461	0.00210324	-0.08
L141V	2944	SOL	2471.1	567.729	123.123	0.679127	0.330334	0.683354	4011.5	1419	10479	-0.76289	-0.0153282	3.2
L141M	2946	SOL	3959.15	1787.74	269.388	1.08363	1.04699	1.4981	6024.5	238.25	17834.5	-0.0871896	0.296274	1.91
L141A	2947	SOL	3640.03	1662.01	226.516	0.999127	0.975966	1.24847	2700	4528.75	4713.5	-0.0760795	0.206977	7.34
L141W	2948	SOL	4501.72		297.824	1.2298		1.64562	6216.75		9167.5		0.268192	3.78
L141T	2949	SOL	2486.18	919.553	129.957	0.683384	0.532667	0.720672	3418	1798	11625.5	-0.28673	0.0326087	5.21
L141Y	2950	SOL	3618.99	1316.03	168.714	0.990803	0.759594	0.933978	6233.5	1099.25	7160.5	-0.303686	-0.0818414	-1.83
L141G	2951	SOL	2554.23	1004.78	157.954	0.698578	0.572333	0.879674	2831.75	2335	9316.75	-0.225095	0.200703	8.19
L141S	2952	SOL	3441.9	1091.45	171.775	0.941034	0.648999	0.954145	10752.8	1261.5	5823.25	-0.440626	-0.0136884	6.5
L141N	2953	SOL	3705.49		214.686	1.01494		1.19352	6921.75		14546.2		0.135509	2.98
L141H	2954	SOL	3724.03	1374.38	195.52	1.01835	0.792465	1.09196	13109.2	1229	9187	-0.288916	0.0370071	0.13
L141P	2955	SOL	630.783	163.009	96.1011	0.172589	0.0926583	0.533422	10295	2078	17299.8	-0.64527	1.10235	13.89
L141Q	2956	SOL	3071.39	1259.36	187.875	0.83984	0.709231	1.04074	5651.75	818	14261.8	-0.18364	0.189797	-2.93
L141R	2957	SOL	3612.06	2125.26	298.776	0.98557	1.23046	1.65115	5885.75	2750	6695.25	0.177504	0.491568	3.14
L141E	2958	SOL	1212.95	209.21	100.383	0.328766	0.121463	0.556313	7624.75	2851	10931	-1.04958	0.49209	2.12
L141K	2959	SOL	4334.77	2010.62	279.469	1.18514	1.16567	1.54778	4888.75	1238.5	9116.5	-0.0603402	0.242373	0.85
L141D	2960	SOL	613.631	279.668	109.7	0.169131	0.156468	0.606207	7095	528.5	8554.25	-0.0779043	1.26226	2.54
A148I	3088	SOL	3347.27		157.389	0.918642		0.881585	973.75		3773.5		-0.0732736	-1.59
A148F	3090	SOL	3176.75	1060.98	182.968	0.869614	0.611901	1.00754	952.5	1180.25	2201.75	-0.388776	0.129603	3.56
A148V	3091	SOL	3454.03		193.925	0.945483		1.07324	6396		15059.5		0.104078	-4.54
A148M	3093	SOL	2612.86	1494.14	204.589	0.713684	0.862786	1.13126	271.25	497.75	10335.2	0.148993	0.43671	1.88
A148W	3095	SOL			255.856			1.41588			3724			6.11
A148T	3096	SOL	3638.17	1525.82	213.767	0.995141	0.887204	1.17896	5541	2490	2753.5	-0.161065	0.149556	2.96
A148Y	3097	SOL	3604.96	1619.08	224.937	0.987722	0.943475	1.24733	2535.25	824.5	3242.25	-0.0925657	0.209663	3.54
A148G	3098	SOL	4490.58	1439.55	276.349	1.2288	0.847008	1.53106	5050.5	887	7707.5	-0.429764	0.195832	-0.25
A148N	3100	SOL	4202.9	1299.27	244.17	1.1504	0.742236	1.34879	3446.5	44	9559	-0.466088	0.13824	0.19
A148H	3101	SOL	3485.91	1627.63	248.75	0.955961	0.960304	1.38057	2937.5	1103	9764.5	-0.053718	0.343869	2.57
A148P	3102	SOL	3385.52		158.985	0.926748		0.873184	3182.5		2933		-0.074545	3.15
A148Q	3103	SOL	3574.31	1463.33	190.764	0.975115	0.843413	1.06571	2628.75	1347.5	3237.25	-0.185169	0.0534165	-1.09
A148R	3104	SOL		1777.32	276.403		1.06417	1.52141		411.75	6491.75			-1.5
A148E	3105	SOL	3762.45		159.409	1.03078		0.887754	5079.5		4825		-0.177445	1.11
A148K	3106	SOL	4426.82		275.659	1.20951		1.51719	1354.25		4325.75		0.207632	-1.71
A148D	3107	SOL	3855.33		180.368	1.05522		1.00564	3265.5		8343.5		-0.0783099	3.54
N152I	3172	SOL	2642.31		115.699	0.721255		0.641469	2188.25		3537		-0.144513	4.22
N152L	3173	SOL			124.449			0.696291			1109			1.41
N152F	3174	SOL	2114.27	494.441	116.159	0.579536	0.286366	0.647506	1612.75	875.75	3399.25	-0.74515	0.0824004	4.11
N152V	3175	SOL	2525.93			0.69227			1999.25					2.93
N152C	3176	SOL			150.776			0.833015			633.75			5.85
N152M	3177	SOL	2556.49		138.825	0.700233		0.772964	3319.75		1806.75		0.0707343	2.37
N152A	3178	SOL	3344.99		174.764	0.913273		0.960639	315.75		1342.5		0.0321233	3.66
N152W	3179	SOL			190.469			1.05024			1243			4.74
N152T	3180	SOL	3135.78	1185.82	164.573	0.858058	0.670532	0.920123	3551.75	577.75	6271	-0.264559	0.0366256	-2.25
N152Y	3181	SOL	2408	679.564	146.152	0.662141	0.379808	0.813402	2056.75	553	6404	-0.557212	0.182003	0.01
N152G	3182	SOL	3850.01		228.972	1.05448		1.26527	3042		5529.75		0.161677	6.4
N152S	3183	SOL	3621.43	1358.25	205.657	0.989914	0.819854	1.13146	6663.5	1124	3240.75	-0.272781	0.115491	3.19
N152H	3185	SOL	3349.09		211.754	0.915189		1.17929	1389.75		6104.25		0.222888	2.44
N152P	3186	SOL	2789.05		184.25	0.763128		1.02625	303.25		1641.75		0.266744	9.5
N152Q	3187	SOL	3638.53	529.697	181.705	0.997426	0.283206	1.00146	2035	51.5	2870	-1.21914	-0.0130441	-0.32
N152R	3188	SOL	4055.65		280.685	1.10985		1.55608	1029.5		2439.25		0.313272	0.52
N152E	3189	SOL			137.827			0.762129			4215.75			1.16
N152K	3190	SOL	4304.07	1692.53	282.193	1.17629	0.999297	1.55868	778.75	492	1847.25	-0.225451	0.259182	2.38
N152D	3191	SOL	1908.67	728.092	131.918	0.523435	0.401562	0.728799	1156.75	852	4590	-0.25585	0.311922	5.17
E156I	3256	SOL			255.121			1.4364			592			-3.1
E156L	3257	SOL	4734.09		303.961	1.29231		1.67661	158.75		4274.5		0.238259	-2.8
E156V	3259	SOL	4722.18		285.588	1.29242		1.56863	1599.75		1366.25		0.178431	-5.73
E156C	3260	SOL			314.269			1.73704			1842			-1.94
E156M	3261	SOL	4110.56		310.3	1.12077		1.7109	1949.5		2655.25		0.400133	-4.92
E156A	3262	SOL			315.388			1.74124			3890.75			-0.26
E156W	3263	SOL	4318.23	2169.97	285.812	1.17838	1.25255	1.60094	1781.25	553.25	1442.75	0.0197557	0.268638	-3.39
E156T	3264	SOL	5167.06		253.854	1.41788		1.39274	1072.5		2993.25		-0.0293946	-0.88
E156Y	3265	SOL	4182.04			1.14499			479.75					-6.07
E156G	3266	SOL	4515.48		305.596	1.23642		1.69212	1767.5		1070		0.290904	0.64
E156S	3267	SOL	4513.74	1932.14	316.969	1.231	1.10546	1.75579	1797	806.5	2485.5	-0.140612	0.327829	-0.46
E156N	3268	SOL	3747.72		291.747	1.02738		1.62714	659		1422		0.43089	-6.17
E156P	3270	SOL	3664.53			1.00407			537.75					1.33
E156Q	3271	SOL			292.433			1.62386			4215			-5.68
E156R	3272	SOL		1917.4	284.115		1.10068	1.56504		115.5	4343.25			-3.66
E156K	3274	SOL		1682.25	275.06		0.96287	1.49544		270.25	411			-6.43
E156D	3275	SOL	2984.14		157.344	0.820844		0.881345	1557		4565.25		0.0412747	1.29
I160F	3342	TMD	858.285		96.9349	0.235856		0.536708	922.25		3477.5		0.80301	-9.23
I160V	3343	TMD			190.468			1.05918			2093.25			-1.51
I160C	3344	TMD		764.406			0.454963			765.75				-8.52
I160M	3345	TMD	460.264		105.197	0.127038		0.588811	212.25		476.5		1.50795	-6.69
I160A	3346	TMD			107.122			0.594585			1134.25			-11.42
I160W	3347	TMD	732.986		97.9196	0.203204		0.543816	2375.75		663		0.970926	-6.19
I160T	3348	TMD	2391		150.352	0.65739		0.834827	1505.25		4833.25		0.217417	-9
I160Y	3349	TMD	930.265		92.9061	0.258619		0.516575	495		7889.25		0.680026	-0.3
I160G	3350	TMD	324.804	548.824	90.8498	0.0892478	0.275758	0.503417	2397.75	157.25	3278.75	1.23244	1.70989	-8.71
I160S	3351	TMD	419.238		93.4	0.115153		0.517135	773.25		10405.2		1.48236	-10.23
I160N	3352	TMD	630.835	292.566	102.202	0.174335	0.155202	0.560728	4069.75	839.75	6593.25	-0.0604684	1.16381	-14.03
I160H	3353	TMD	583.627	187.557	99.445	0.160585	0.110883	0.54899	3499.5	1209.75	6703.25	-0.427293	1.21425	-2.45
I160P	3354	TMD	3448.35		239.077	0.936679		1.31899	431.75		1302.75		0.315042	0.63
I160Q	3355	TMD	467.525		91.932	0.127877		0.508424	1281		1733.75		1.3575	-1.69
I160R	3356	TMD	381.27	979.536	90.6933	0.104004	0.537815	0.50189	1686.25	599	4095	1.65146	1.54788	-4.67
I160E	3357	TMD			102.265			0.564072			1960			-3.96
I160K	3358	TMD	332.66		97.1794	0.0915198		0.544436	755		2428.25		1.75334	-3.25
I160D	3359	TMD	467.052	402.668	100.353	0.127138	0.217922	0.555668	1479.5	2163.75	3511	0.559559	1.44616	-5.37
A163I	3403	TMD			97.9705			0.544814			1622.5			-0.29
A163L	3404	TMD			90.7263			0.499433			896.25			-6.43
A163F	3405	TMD	354.174		86.4418	0.097058		0.480343	1541.25		772.75		1.57359	-3.76
A163C	3407	TMD	492.309			0.136025			596.5					-2.05
A163T	3411	TMD	708.507		98.8989	0.196185		0.544791	785.5		2834.25		1.01484	-0.23
A163Y	3412	TMD	406.141		96.8887	0.111412		0.539311	1736.5		2066		1.55077	-1.66
A163G	3413	TMD		206.353			0.115105			588.5				-9.05
A163H	3416	TMD	393.514	209.052	118.981	0.108004	0.122346	0.663816	1758	907.5	2270	0.0753517	1.78776	-2.54
A163P	3417	TMD		296.442	114.283		0.164173	0.639638		513.5	3165.75			8.13
A163E	3420	TMD	528.449		110.281	0.145699		0.606595	2391.25		1322.75		1.41699	-0.85
A163D	3422	TMD	1034.41			0.28574			1792.5					2.09
I165L	3446	TMD	2966.81		170.649	0.815575		0.94664	766.5		6032.25		0.128274	0.83
I165F	3447	TMD	2430.66		144.764	0.66766		0.801732	2919		4750.5		0.163094	1.91
I165V	3448	TMD	3262		154.671	0.893416		0.858318	3082		7059.5		-0.0648909	1.12
I165C	3449	TMD	1607.05		128.34	0.442507		0.715289	3533.5		5947.25		0.456438	3.83
I165M	3450	TMD	2179.49		126.703	0.597475		0.704414	3920.5		3725.25		0.1389	0.96
I165A	3451	TMD	2500.77	567.167	140.155	0.685993	0.321672	0.7738	4275.25	252.5	1633	-0.775816	0.102302	2.03
I165W	3452	TMD	1230.68		115.06	0.338939		0.632762	606		640.75		0.614038	1.17
I165T	3453	TMD	2936.05		139.674	0.804585		0.767575	3032		4223.5		-0.0616023	3.09
I165Y	3454	TMD	578.682	718.526	110.334	0.15822	0.404899	0.619972	2407.25	782	4559	0.924335	1.32666	2.64
I165G	3455	TMD	3188.97	1194.62	175.752	0.869714	0.696949	0.984275	949.25	813.75	7363.5	-0.273983	0.085526	4.39
I165S	3456	TMD	1407.53		107.457	0.386762		0.598154	1837.75		6555.5		0.411408	6.92
I165N	3457	TMD	499.273		91.8957	0.135926		0.509149	1366.75		4845.75		1.29141	4.14
I165H	3458	TMD	531.089	172.703	101.445	0.145514	0.100585	0.559048	4046.5	732.25	4150.25	-0.415471	1.3285	3.91
I165P	3459	TMD	303.77		95.571	0.0831612		0.531234	2159.75		8136.75		1.82751	13.08
I165Q	3460	TMD			96.5514			0.533401			4565.5			3.65
I165R	3461	TMD	480.747	330.566	106.843	0.132319	0.191449	0.593454	2074.25	1569	7161	0.333352	1.47993	2.76
I165E	3462	TMD	842.381	278.342	97.2348	0.229787	0.160407	0.539629	4150.75	354.75	9054.5	-0.399494	0.824802	7.01
I165K	3463	TMD	704.03		95.0968	0.195619		0.529549	3116.5		3978.5		0.981981	6.09
I165D	3464	TMD	428.572	197.917	101.967	0.117742	0.112802	0.565373	2632	720.75	5289.75	-0.0647265	1.5481	6.6
I168L	3509	TMD	4137.27		286.865	1.13193		1.59111	6164.5		8189.25		0.315126	2.62
I168F	3510	TMD	3889.29	1543.96	280.941	1.06517	0.917514	1.55434	2324	643.5	7653	-0.215991	0.35607	8.24
I168V	3511	TMD	2502.57	1032.56	197.974	0.686175	0.558761	1.09995	684.75	306	4233.5	-0.177388	0.446965	5.91
I168C	3512	TMD	3696.1		198.852	1.00997		1.09972	3966		1345.75		0.0614316	14.48
I168M	3513	TMD	3920.93	1842.24	269.973	1.07416	1.06774	1.49817	2386.25	903	6981.5	-0.0474601	0.308142	8.09
I168A	3514	TMD	4163.52		303.68	1.13838		1.68359	1594.5		8338.25		0.365765	7.59
I168W	3515	TMD	763.215	577.509	119.251	0.209253	0.293095	0.662537	3951	1342.75	3899.5	0.429072	1.1276	9.51
I168T	3516	TMD	2017.96		114.519	0.553342		0.634862	5115.75		12011		0.114802	9.21
I168Y	3517	TMD	382.05		102.607	0.104879		0.566686	11367		9584.25		1.66926	8.9
I168G	3518	TMD	4449.09	1733.33	306.799	1.214	1.0453	1.69997	4163.5	1191.5	13402.8	-0.234768	0.309643	6.95
I168S	3519	TMD	3188.18		194.339	0.87596		1.07895	1423.75		9895.75		0.186304	11.02
I168N	3520	TMD	407.344		114.714	0.112137		0.640597	4728.75		6954.75		1.71669	12.19
I168H	3521	TMD	723.514	173.602	97.1152	0.198919	0.100754	0.537935	4063	1703.5	5560.75	-0.719465	0.975684	10.75
I168P	3522	TMD	357.438		96.1567	0.097773		0.531171	1168		8826		1.67092	17.89
I168Q	3523	TMD	969.844	431.169	92.5584	0.266718	0.238402	0.512043	1113	614.75	4540	-0.10275	0.63461	13.35
I168R	3524	TMD	556.527		101.171	0.152667		0.561047	3538.25		2003.25		1.279	11.81
I168E	3525	TMD	524.155	216.727	94.9587	0.143944	0.126093	0.529774	4171.75	624.75	11739	-0.175263	1.27556	13.85
I168K	3526	TMD	422.238		101.354	0.116229		0.565007	5515		11425.8		1.55696	14.15
I168D	3527	TMD	362.798		93.8103	0.0995437		0.518079	1187.5		5925.5		1.63133	15
Q174I	3634	TMD			279.811			1.56453			886.5			0.82
Q174L	3635	TMD	729.331		298.846	0.199007		1.66405	470.5		3611.5		2.09171	0.82
Q174F	3636	TMD			268.312			1.47944			1762.5			3.47
Q174V	3637	TMD	616.917	955.35	279.036	0.169251	0.595941	1.54878	742.25	2960	1838.75	1.14523	2.19051	2.26
Q174C	3638	TMD	1200.45	310.771	243.337	0.32975	0.179673	1.36137	1516.5	1034.5	575.75	-0.643508	1.3879	1.49
Q174M	3639	TMD			308.017			1.70475			1392.25			-3.09
Q174W	3641	TMD	660.822		294.564	0.181589		1.63772	724.75		4294		2.17592	-4.77
Q174T	3642	TMD			164.968			0.903262			1703			-2.02
Q174Y	3643	TMD	1004.43		129.608	0.271004		0.719882	1304.25		642.25		0.936245	-0.02
Q174G	3644	TMD	1032.15		238.238	0.281019		1.32759	2033.5		2907		1.51777	-1.59
Q174N	3646	TMD			267.719			1.47998			2127.5			-4.11
Q174H	3647	TMD	2300.69	1187.97	252.464	0.631776	0.716012	1.40105	3436.75	824.75	3308.25	0.0469287	0.774212	1.35
Q174P	3648	TMD	676.052	201.463	172.694	0.184158	0.113524	0.959466	3045.75	1125.25	3391.25	-0.502776	1.61916	7.46
Q174E	3651	TMD	2622.89	1732.23	272.398	0.717607	1.0049	1.50508	1453	1423	1267.75	0.293016	0.719138	5.01
Q174K	3652	TMD	824.695		102.672	0.226298		0.567514	2442		5794		0.900434	-0.2
Q174D	3653	TMD		231.444	129.251		0.139397	0.721746		520.75	2178.25			0.24
L175I	3655	TMD	3139.53		124.439	0.850916		0.676517	512.25		586.5		-0.244106	-8.84
L175F	3657	TMD	2218.41			0.61267			441.75					-4.17
L175V	3658	TMD			115.841			0.645409			2030			-7.16
L175C	3659	TMD	393.962	191.724	105.801	0.107914	0.111041	0.589666	758.25	1113	1401.5	-0.0123099	1.66921	2.29
L175A	3661	TMD	3199.12		119.053	0.866228		0.664099	132.75		1739		-0.307153	-1.96
L175W	3662	TMD			97.0063			0.537436			1292.75			-2.46
L175T	3663	TMD		302.83	131.085		0.161283	0.732374		808.25	1091			-1.45
L175Y	3664	TMD	1185.45	249.589		0.328943	0.147719		846.75	939.25		-0.850178		-4.75
L175G	3665	TMD	538.316		108.219	0.149029		0.594452	304.25		466.75		1.37961	-3.36
L175S	3666	TMD	2306.72		129.053	0.627643		0.723743	1168.5		1363		0.100542	-5.24
L175N	3667	TMD			114.625			0.631783			1042.75			-1.83
L175H	3668	TMD			142.02			0.790564			945.5			-5.2
L175R	3671	TMD	988.071		95.9809	0.270126		0.528635	365.5		485.5		0.652301	-1.71
I177L	3698	TMD	2998.84		278.068	0.817351		1.54614	1118		852.25		0.605791	-2.88
I177F	3699	TMD		1670.94	311.041		0.982376	1.71963		485	2313.5			2.22
I177V	3700	TMD	4310.99		278.436	1.17492		1.53475	1636		2557.5		0.244169	142
I177C	3701	TMD	1425.99		325.326	0.391881		1.79817	563		2433.25		1.50611	2.58
I177M	3702	TMD			235.956			1.31599			4242			0.24
I177A	3703	TMD			296.229			1.6195			2333.25			8.37
I177W	3704	TMD			272.092			1.50413			2257.5			9.28
I177T	3705	TMD	2896.54		308.407	0.794552		1.71647	1206.75		2968.25		0.744052	5.79
I177Y	3706	TMD	3702.15		297.038	1.01363		1.63674	2149.5		4145.5		0.461097	7.29
I177G	3707	TMD	2125.9		317.885	0.580213		1.75197	3535		2762.25		1.08365	2.95
I177S	3708	TMD	2075.88	848.344	312.967	0.566767	0.501215	1.73365	1324.75	419	3596.75	-0.18697	1.09186	3.6
I177N	3709	TMD	2229.77		305.415	0.607869		1.67908	234.5		5663.5		0.995923	3.91
I177H	3710	TMD	1877.9		309.474	0.514156		1.71956	886		2187.5		1.18087	-3.31
I177P	3711	TMD	1028.4			0.27935			394.75					8.96
I177Q	3712	TMD		887.464	306.213		0.517314	1.69718		336	802.5			1.62
I177R	3713	TMD	1955.24	448.387	300.59	0.531402	0.235633	1.6661	373.25	330	3146.25	-0.764723	1.11139	5.99
I177E	3714	TMD	2377.93			0.651453			751					7.7
I177K	3715	TMD			302.879			1.67561			2039.75			4.71
I177D	3716	TMD	1536.34	511.316	278.296	0.417856	0.284681	1.51202	878.75	244.75	725.5	-0.392286	1.27543	4.65
G188I	3928	SOL			183.375			1.00808			3497.75			-0.73
G188L	3929	SOL	1605.16	574.331		0.44063	0.31674		1973.5	275.75		-0.319887		3.69
G188F	3930	SOL			163.183			0.906803			2523.5			0.62
G188V	3931	SOL	2131.21	604.411	185.41	0.585118	0.360989	1.03234	401.25	1663.5	4164.5	-0.552302	0.542033	6.14
G188C	3932	SOL	485.135	245.326	150.189	0.133228	0.148844	0.84703	756	1643.5	468.25	0.0260466	1.81137	-2.11
G188M	3933	SOL	1706.23	345.017		0.469158	0.198068		1366.25	1095		-0.890564		0.52
G188A	3934	SOL	2326.1			0.640605			616.5					3.63
G188W	3935	SOL	670.07		159.151	0.18384		0.884174	456		5565.5		1.54638	-2.55
G188T	3936	SOL	2809.34			0.769767			640.25					1.41
G188Y	3937	SOL			149.479			0.850435			444.75			1.74
G188S	3939	SOL	4598.02			1.25673			1367.5					1.87
G188H	3941	SOL			157.909			0.898916			225.5			3.56
G188P	3942	SOL	3277.52			0.896108			540.25					2.75
G188Q	3943	SOL	2983.35		191.573	0.814985		1.05539	1379.25		2498.75		0.238373	-3.15
G188R	3944	SOL			218.639			1.20117			1197.5			-1.93
G188E	3945	SOL	2541.35		185.967	0.697991		1.024	4334.5		1427.5		0.369026	-1.15
G188K	3946	SOL	2718.69	837.549	219.686	0.746032	0.504411	1.20995	1455.75	628.5	1821	-0.469538	0.468202	1.26
F192I	4012	SOL			283.751			1.58849			2812.25			-2.06
F192L	4013	SOL			241.263			1.34154			1165.5			1.03
F192V	4015	SOL	3160.83		232.052	0.863789		1.27089	1944.25		2188.5		0.372277	-0.88
F192C	4016	SOL			169.8			0.953822			3356.75			-1
F192M	4017	SOL			258.086			1.42645			2461.5			-0.84
F192A	4018	SOL	2309.5		241.252	0.63307		1.32689	2351.5		4308.5		0.724961	1.28
F192W	4019	SOL	4616.96		210.293	1.263		1.1683	539.75		1990		-0.105087	-4.53
F192T	4020	SOL			233.021			1.28682			852.25			0.35
F192Y	4021	SOL	3925.02		246.582	1.07523		1.36368	846.25		1054.75		0.216472	-0.61
F192G	4022	SOL	962.453		230.582	0.264438		1.28156	2058.25		2738.75		1.55503	1.12
F192S	4023	SOL	1357.83		230.009	0.373365		1.25529	685		1445.5		1.20838	2.44
F192N	4024	SOL			242.218			1.34596			2430.75			-0.31
F192H	4025	SOL			237.563			1.33822			765.5			-5.25
F192P	4026	SOL	1353.97		207.295	0.36648		1.14615	703.25		3167.5		1.10725	2.56
F192Q	4027	SOL			272.858			1.516			1885.25			-1.83
F192R	4028	SOL	1709.12		300.583	0.468735		1.66082	1714.5		3845.5		1.2459	-2.92
F192E	4029	SOL	2147.03	439.782	225.877	0.582877	0.255076	1.26157	88.75	912	1890.5	-0.877676	0.732054	-0.18
F192K	4030	SOL	1144.32			0.312897			2446.75					4.85
F192D	4031	SOL	1804.43		184.134	0.493339		1.01969	299.25		5962.75		0.701571	6.18
V196I	4096	SOL	1915.62	426.366	155.03	0.526392	0.243746	0.855128	2299.5	247.5	3197.75	-0.794611	0.46973	-0.88
V196L	4097	SOL	1775	690.464	159.837	0.485437	0.421929	0.888192	1208.75	921.5	3162.5	-0.236308	0.576501	0.65
V196F	4098	SOL			156.926			0.866382			2658.75			6.34
V196M	4101	SOL	3627.78	1636.86	177.17	0.993339	0.978143	0.980262	3886	697.75	11336.8	-0.0879511	-0.0353602	0.47
V196A	4102	SOL	3649.48	1149.64	255.976	0.998288	0.725284	1.42592	751.5	628.75	9681	-0.447245	0.326648	-1.09
V196W	4103	SOL	1384.22	397.696	165.019	0.379881	0.236832	0.909049	2397.75	194	9955	-0.539321	0.857069	7.06
V196T	4104	SOL	4366.61		261.717	1.19376		1.46866	1217		9224		0.169426	-1.72
V196Y	4105	SOL			173.423			0.965555			6017.25			7.24
V196G	4106	SOL	3847.46	2103.19	270.026	1.05786	1.21492	1.49353	1560.5	629.25	8312	0.103929	0.327258	-0.19
V196S	4107	SOL	4996.33		294.022	1.36485		1.62469	1003		4292.25		0.151101	-1.53
V196N	4108	SOL	2741.04		177.904	0.75315		0.988658	1223.25		5567.5		0.249056	0.32
V196H	4109	SOL	2422.19		160.021	0.662976		0.890516	1028.5		5084.25		0.266784	5.32
V196P	4110	SOL	851.907	1226.66	149.27	0.230422	0.755571	0.826763	639.5	810.5	6055.5	1.07246	1.24219	3.98
V196Q	4111	SOL	2059.79	423.823	179.336	0.565287	0.245668	0.990955	2000.25	1581.75	2371.25	-0.873157	0.542804	-7.13
V196R	4112	SOL	1137.75		197.58	0.312458		1.0949	4295.5		4002.75		1.23324	-1.15
V196E	4113	SOL	1000.27		129.31	0.274581		0.714668	5010.25		7785.5		0.938091	-0.85
V196K	4114	SOL	922.091	244.325	155.157	0.254128	0.143105	0.856185	2730.5	1096	5149	-0.620256	1.2017	6.15
V196D	4115	SOL	3280.33		131.945	0.900333		0.733802	2999.75		2220.75		-0.229406	1.57
S200I	4180	SOL	1784.23	683.375	279.501	0.487615	0.412814	1.53888	2537	478.75	997	-0.251809	1.13017	1.32
S200L	4181	SOL			219.127			1.21049			1729.5			-2.17
S200F	4182	SOL	944.751		124.678	0.259373		0.691418	2012.25		1128.75		0.958722	-3.66
S200V	4183	SOL			312.763			1.73318			657.75			-0.19
S200C	4184	SOL	749.313	300.371	250.27	0.205324	0.176749	1.37717	491.5	570	1926	-0.20625	1.88729	-2.41
S200M	4185	SOL	1745.49		176.047	0.479507		0.977376	844.25		2851.75		0.689867	-2.22
S200A	4186	SOL			253.779			1.40637			2675.5			-2.46
S200W	4187	SOL			128.357			0.713398			2712.25			0.18
S200T	4188	SOL	2057.48		213.532	0.565963		1.1897	352.75		1439.5		0.718457	-4.72
S200Y	4189	SOL	1302.04		157.903	0.357425		0.86847	648		3403		0.874203	-6.74
S200G	4190	SOL		821.665	195.455		0.464604	1.08054		1320	2973			-5.74
S200N	4192	SOL	2106.67		203.057	0.577233		1.12383	5993.25		4131.25		0.644531	-4.03
S200H	4193	SOL	2093.01	605.691	214.258	0.571497	0.365845	1.19784	1214.75	938.75	425.75	-0.5321	0.704731	-7.91
S200P	4194	SOL		676.274	151.268		0.399223	0.838981		1496.5	524.75			-3.28
S200R	4196	SOL	2122.2		193.007	0.583633		1.06442	1182.25		4697.75		0.586424	-5.38
S200K	4198	SOL	1990.58		194.062	0.546802		1.07743	548.5		3030.75		0.655906	-4.37
S200D	4199	SOL	2779.28		197.286	0.7676		1.0944	317.5		5121		0.338615	-5.92
W204I	4264	SOL	1906.13		132.709	0.524463		0.731703	470.75		2367.5		0.319233	5.21
W204L	4265	SOL	2397.67		158.409	0.658163		0.884427	1414.75		3219		0.266834	-1.24
W204F	4266	SOL	2627.01		157.568	0.719723		0.854705	2104		437.5		0.170158	6.96
W204V	4267	SOL			187.377			1.0333			2733			0.06
W204C	4268	SOL	478.342		160.501	0.130777		0.883326	810		3523		1.89188	2.65
W204M	4269	SOL	2945.9		197.014	0.808434		1.08624	1956.5		1680		0.279009	-1.62
W204A	4270	SOL			270.643			1.51863			498.75			3.88
W204T	4272	SOL	3318.55			0.905951			491					4.09
W204Y	4273	SOL	3477.74		228.558	0.950728		1.27655	1863		1271.75		0.261556	2
W204G	4274	SOL	3043.05		264.75	0.832959		1.463	216.25		2600.25		0.542078	5.82
W204S	4275	SOL	3070.64		266.317	0.842226		1.46554	2087.5		1296.5		0.538949	1.35
W204N	4276	SOL			221.686			1.25453			622.25			1.53
W204H	4277	SOL	3705.73		246.918	1.01403		1.36084	1815.5		4142.75		0.275328	2.25
W204P	4278	SOL	4654.37		274.662	1.27417		1.51374	525.75		794.75		0.153884	10.49
W204Q	4279	SOL			251.699			1.38227			2672.25			-1.25
W204R	4280	SOL			260.514			1.4468			1553.75			0.5
W204E	4281	SOL	3289.05		221.169	0.901286		1.21856	568.5		3814.25		0.284478	5.4
W204K	4282	SOL	4147.57		261.189	1.12972		1.45266	1836.25		6931.25		0.218871	-3.93
A208I	4348	SOL		489.195	127.573		0.278727	0.714471		934	3397.5			-0.14
A208L	4349	SOL	1346.95		128.967	0.367797		0.711686	429.75		3170		0.637862	1.45
A208F	4350	SOL			185.466			1.02225			2063.75			-4.71
A208V	4351	SOL	2807.91		148.612	0.768925		0.825307	2371		964.75		0.045049	1.66
A208C	4352	SOL			172.453			0.950884			5508.25			1
A208M	4353	SOL	2665.42			0.733572			403					-1.68
A208W	4355	SOL	3885.01			1.06314			1437.25					-1.93
A208T	4356	SOL	2540.78		278.685	0.688095		1.5493	73.5		2166.75		0.77376	-1.01
A208Y	4357	SOL	3304.78		162.58	0.907136		0.908122	975.25		1631		-0.0280488	-3.15
A208G	4358	SOL	2445.81		275.382	0.6695		1.52603	77		5402.25		0.799932	5.54
A208S	4359	SOL		1442.75	218.761		0.843632	1.22108		1229.25	4211.5			1.27
A208N	4360	SOL	3356.97		236.932	0.921046		1.31539	911.5		2237.25		0.332884	1.01
A208H	4361	SOL	4244.21		241.854	1.16026		1.32473	2578		1785.25		0.118931	2.85
A208P	4362	SOL	1767.75		202.789	0.481135		1.1386	202		3224		0.818611	10.18
A208Q	4363	SOL	4213.46			1.15244			1523.5					0.93
A208R	4364	SOL	4386.32		244.555	1.19723		1.34909	853.75		895		0.0971007	0.24
A208E	4365	SOL		2003.06	283.004		1.14593	1.57008		656.25	4076.75			3.84
A208K	4366	SOL			242.107			1.34984			1479.5			-2
A208D	4367	SOL	4358.35		303.215	1.18912		1.67752	4853.25		5615.25		0.3185	7.58
F219I	4579	TMD	788.774	259.202	107.117	0.216625	0.151591	0.594291	3353.25	275.5	2254	-0.404987	0.987345	-3.76
F219L	4580	TMD	2031.45		97.155	0.561392		0.543282	218.5		7123		-0.056289	-2.22
F219V	4582	TMD	1083.37	391.57	115.956	0.296731	0.203366	0.642906	4022.25	220	5194.75	-0.309783	0.749279	-1.87
F219C	4583	TMD	1015	336.287	120.959	0.278033	0.196609	0.665556	737.25	1266.5	12651.5	-0.396795	0.85671	6.59
F219M	4584	TMD	546.717	328.002	102.993	0.150196	0.185497	0.573846	3726.25	1181.25	2318	0.196975	1.31463	1.92
F219A	4585	TMD	1295.12	589.575	92.9324	0.356228	0.336243	0.515992	2105.5	754.25	3960.5	-0.0790665	0.349423	3.92
F219W	4586	TMD	1709.98			0.470147			3814					-2.85
F219T	4587	TMD	496.697	1230.04	101.396	0.13653	0.737124	0.564279	1154.5	485	4340.25	1.61471	1.39496	4.85
F219Y	4588	TMD	3726.99		272.428	1.01704		1.50862	847		7721.25		0.367923	-1.64
F219G	4589	TMD	516.936	222.835	93.4488	0.141911	0.123535	0.515751	4590.25	732.5	1946.5	-0.133599	1.2734	7.35
F219S	4590	TMD	404.819	600.736	96.0359	0.111009	0.326306	0.532101	1873	1509.25	3113.75	1.1026	1.54519	6.04
F219N	4591	TMD	540.039		105.045	0.14767		0.573693	612.75		8696.25		1.34665	2.34
F219H	4592	TMD	1056.01	391.53	99.5642	0.290315	0.224464	0.552132	1932.5	852.5	2997.75	-0.284306	0.622452	4.76
F219P	4593	TMD	649		94.6339	0.179102		0.526036	767		5290.75		1.05849	13.96
F219Q	4594	TMD	594.83		111.354	0.162867		0.617458	1910.5		1596.25		1.30835	-0.12
F219R	4595	TMD	1665.93		95.476	0.457181		0.529142	3885.5		4583.5		0.124643	0.44
F219E	4596	TMD	506.715		97.5624	0.139046		0.538552	4627.75		4650.5		1.33645	3.82
F219K	4597	TMD	450.441		106.737	0.12404		0.602821	4317.75		1601.75		1.54404	6.83
F219D	4598	TMD	565.45		97.8365	0.156569		0.543187	2462.25		10838.2		1.22958	8.16
I221L	4622	TMD	2439.25	830.743	151.717	0.66923	0.488152	0.842431	5580.25	1215.25	7953.5	-0.369238	0.206476	1.97
I221F	4623	TMD	3263.75		175.338	0.894845		0.970316	4946.25		9518.25		0.0599893	2.97
I221V	4624	TMD	3484.39	1542.13	165.762	0.956609	0.912045	0.913988	4324.75	881.5	5050.25	-0.107238	-0.0615904	3.83
I221C	4625	TMD	2400.47	801.808	123.999	0.659471	0.464164	0.688516	10008.8	432	4762.5	-0.388664	0.0207605	6.21
I221M	4626	TMD	2863.46	787.958	127.61	0.785613	0.438404	0.710434	7835.75	862.5	12703	-0.582455	-0.126903	0.98
I221A	4627	TMD	2903.8	846.31	138.438	0.796828	0.495208	0.773341	2776	558.75	9116.75	-0.525003	-0.0594462	4.75
I221W	4628	TMD	938.958	287.489	95.969	0.257859	0.164248	0.533435	10901.2	1080.25	5799.75	-0.475699	0.70316	2.7
I221T	4629	TMD	1344.08	299.686	99.297	0.370332	0.169994	0.549555	3659.5	1945	12406.5	-0.79284	0.378558	6.5
I221Y	4630	TMD	459.881	314.032	98.0906	0.125807	0.178696	0.544216	10790.2	317	25425	0.326414	1.43883	3.48
I221G	4631	TMD	3374.55		170.792	0.924228		0.953946	5700.5		9861.75		0.000338633	1.04
I221S	4632	TMD	588.106		100.964	0.161291		0.56033	8418		13925.8		1.22177	7.08
I221N	4633	TMD	384.424	316.679	96.3936	0.10542	0.16887	0.536359	10729.5	1120.5	18947.5	0.514031	1.6006	4.62
I221H	4634	TMD	497.118	153.221	97.0799	0.136486	0.0879628	0.539492	14813.2	677	15614	-0.469058	1.35061	5.73
I221P	4635	TMD	525.797	221.946	92.3277	0.144599	0.125886	0.51118	10012.8	883	10354	-0.154592	1.24434	14.23
I221Q	4636	TMD	339.448	1027.75	96.1152	0.09307	0.626185	0.534254	11995.5	848.75	10308.2	1.81569	1.72213	5.07
I221R	4637	TMD	504.62	586.869	97.9412	0.138359	0.333043	0.540948	11119	1934.5	10027	0.858883	1.34447	4.94
I221E	4638	TMD	356.835	157.491	97.5232	0.0979305	0.090611	0.545504	6846.25	1614.75	12238.2	-0.110019	1.68672	7.18
I221K	4639	TMD	539.494	181.595	103.41	0.148609	0.106022	0.57046	9133.25	867.5	8348.5	-0.380963	1.33198	7.15
I221D	4640	TMD	349.992		103.425	0.0961594		0.57513	8908		5845.75		1.76484	7.01
M226I	4726	TMD	4382.92	1598.53	294.481	1.19917	0.894463	1.61829	352.25	492	1259.5	-0.300742	0.28365	-4.66
M226L	4727	TMD	2963.37		170.535	0.811263		0.9437	519.5		198		0.128765	-0.22
M226V	4729	TMD	3714.08	1650.92	292.37	1.01596	0.944013	1.61985	467.75	1442.75	3759.75	-0.102909	0.44204	1.83
M226A	4732	TMD	2777.44		94.1573	0.76352		0.521369	56.5		501.75		-0.400414	-2.75
M226W	4733	TMD		260.295	93.3839		0.147526	0.519315		530	2070.75			-1.11
M226T	4734	TMD	3943.13		162.783	1.07685		0.90008	4141.75		2986.75		-0.203407	2.76
M226G	4736	TMD	1004.52		93.7628	0.274293		0.521115	1140		3597.25		0.612405	5.38
M226N	4738	TMD	1709.46		105.491	0.467964		0.588543	1082		1944.5		0.198601	0.85
M226H	4739	TMD	1478.05		88.4791	0.409312		0.489207	625.25		4381		0.168194	4.76
M226P	4740	TMD	343.503		93.1621	0.0939287		0.519471	654.5		2456		1.67905	8.07
M226Q	4741	TMD			99.4657			0.548315			4097.5			2.6
M226R	4742	TMD	358.263		98.2133	0.0978555		0.538764	442		4072.5		1.68978	3.47
M226E	4743	TMD	665.03	186.132	96.3056	0.183027	0.106356	0.53869	4615.5	272.25	2543.25	-0.565486	1.0516	0.14
M226K	4744	TMD	650.275		107.904	0.17906		0.595993	4236.25		5651.5		1.18775	3.28
M226D	4745	TMD		187.414	96.0698		0.106668	0.536696		732.75	1327.75			4.8
I228L	4769	TMD			124.038			0.688387			5800.25			2.13
I228F	4770	TMD	3948.88		201.861	1.0774		1.11663	350.25		2463.75		0.0103007	3.44
I228V	4771	TMD	3464.1		217.174	0.952099		1.21008	1392.25		1208.5		0.214394	1.85
I228C	4772	TMD			149.039			0.824449			1577.75			4.28
I228M	4773	TMD	2353.8	476.066	115.332	0.642625	0.267174	0.639578	4078.25	280.75	1595	-0.890344	-0.0320687	1.63
I228A	4774	TMD	3163.88		143.655	0.865491		0.806867	1342.25		1030.25		-0.108236	3.21
I228W	4775	TMD	3563.35		212.584	0.973285		1.18713	454		2699		0.164788	2.14
I228T	4776	TMD	2485.24			0.683921			1204.75					3.96
I228Y	4777	TMD	2678.11		255.813	0.733307		1.41543	2429		1057		0.635489	3.93
I228G	4778	TMD			131.973			0.73638			3203.5			4.97
I228S	4779	TMD	1960.18		104.144	0.539036		0.58084	1755.25		3401.5		0.0488858	5.65
I228N	4780	TMD	1155.41		96.9507	0.320011		0.538765	2469.25		4670		0.505899	7.17
I228H	4781	TMD	1779.61		117.76	0.488361		0.649096	1585.25		2287.75		0.268404	7.63
I228P	4782	TMD	3863.48		161.899	1.05825		0.899065	1175.5		2245.5		-0.188445	8.12
I228Q	4783	TMD			99.6934			0.552643			3342.5			5.8
I228R	4784	TMD	916.487	598.524	100.129	0.251362	0.312439	0.556548	1654	447	8114.5	0.281805	0.76982	4.12
I228E	4785	TMD	1155.19		97.6452	0.318133		0.53924	1118.25		445.5		0.513226	3.38
I228K	4786	TMD	714.513	207.952	104.383	0.195238	0.117462	0.581365	1940	166	1542.25	-0.526407	1.06037	4.8
I228D	4787	TMD	311.106		92.5306	0.0855204		0.512976	1002		3866.25		1.77131	9.13
N230I	4810	TMD	416.557		100.543	0.115008		0.558113	1167.75		3962.75		1.56247	-1.58
N230F	4812	TMD			93.8346			0.518242			6984			-5.79
N230V	4813	TMD	995.459			0.272588			200.5					1.42
N230C	4814	TMD			103.234			0.573654			4596.25			2.7
N230M	4815	TMD			128.009			0.694922			2604			-5.34
N230A	4816	TMD	881.419		94.3185	0.242251		0.52089	276		1299.75		0.74905	-0.49
N230W	4817	TMD	415.017		106.89	0.112988		0.593082	622.25		2985		1.62739	-0.65
N230T	4818	TMD			102.308			0.565255			1016.75			1.16
N230Y	4819	TMD	386.116		101.15	0.105627		0.561317	1350.25		1359		1.64437	-5.14
N230G	4820	TMD	840.963		97.3788	0.230525		0.538643	2372.5		1163.25		0.827967	2.58
N230S	4821	TMD	1616.5			0.444799			285.75					1.66
N230H	4823	TMD	1411.98		94.3124	0.383854		0.525681	612.25		2887		0.27777	-2.53
N230Q	4825	TMD			89.4851			0.49236			1964			-4.06
N230R	4826	TMD	406.993		93.2793	0.111583		0.520665	404.75		1796.5		1.51071	-3.02
N230E	4827	TMD	650.849		94.5431	0.178411		0.526329	324.75		3929		1.05468	1.18
N230K	4828	TMD	713.085	675.543	94.2013	0.193896	0.357521	0.520674	1310	438.25	5187.75	0.653802	0.959739	2.19
N230D	4829	TMD	443.108		222.674	0.120771		1.26927	425.25		94.5		2.2958	-1.52
K232I	4852	TMD	1581.23		114.838	0.433855		0.637205	1688.75		3273		0.361469	-2.6
K232F	4854	TMD	1760.32		107.006	0.483706		0.588005	633.5		508.75		0.183541	-0.07
K232V	4855	TMD	1163.83		113.107	0.320236		0.622533	1170		5138.25		0.652766	-3.73
K232C	4856	TMD	841.423		112.759	0.230616		0.637058	1353.25		652.25		0.974065	0.79
K232M	4857	TMD			95.4585			0.532524			893.5			-2.54
K232A	4858	TMD			107.64			0.59674			907.25			-0.89
K232W	4859	TMD	1634.12	319.449	114.988	0.449639	0.189423	0.64653	1578.5	394.75	723.5	-0.924378	0.329875	-1.03
K232T	4860	TMD			97.4547			0.542188			4674.75			-0.52
K232Y	4861	TMD	2577.35		166.173	0.706044		0.909923	1765.5		377.25		0.242416	0.41
K232G	4862	TMD			91.1223			0.504118			3084.25			-1.51
K232S	4863	TMD			90.0919			0.502038			472			-1.02
K232N	4864	TMD	1362.56		109.24	0.373256		0.609186	2011		2073.5		0.460332	-2.45
K232H	4865	TMD	1996.78		131.935	0.547974		0.729227	819.5		2786.75		0.266925	0.08
K232P	4866	TMD	328.984			0.0899756			1008					1.38
K232Q	4867	TMD	1728.31		109.382	0.475287		0.609421	919.5		895.75		0.223856	0.01
K232R	4868	TMD			247.727			1.35681			4781			-1.24
K232E	4869	TMD	420.162			0.115179			2337					0.05
T238I	4978	SOL			153.787			0.855192			1327.75			-4.39
T238L	4979	SOL		694.76	149.035		0.404613	0.831226		1183	3662.5			-0.75
T238V	4981	SOL	3503.57		175.227	0.959874		0.986024	2096.5		2409.5		-0.011551	0.76
T238C	4982	SOL	4566.08		221.164	1.2479		1.24204	2244.5		2658.25		-0.0436022	3.98
T238M	4983	SOL	3387.01		162.275	0.928532		0.911759	4478		2441.75		-0.0545048	1.11
T238A	4984	SOL			159.701			0.884465			2010.75			1.71
T238W	4985	SOL	4336.76		215.665	1.18565		1.18433	1923.5		1925.25		-0.0172502	-0.3
T238G	4988	SOL	2898.33		168.461	0.794064		0.935761	1772		1747.5		0.138719	0.61
T238S	4989	SOL	4083.74		206.452	1.116		1.14881	210		1957.5		-0.00079477	0.31
T238N	4990	SOL	2895.82		186.548	0.789654		1.03127	512		1613.25		0.241572	0.72
T238P	4992	SOL		799.504	102.734		0.42367	0.574369		741.75	4540.5			2.79
T238Q	4993	SOL	3406.93		173.342	0.93221		0.960705	1710.25		6847.25		0.00560324	-0.01
T238R	4994	SOL			248.142			1.37028			2750.5			-2.43
T238E	4995	SOL	1331.93		114.194	0.365172		0.636239	2377.75		2007		0.527424	0.63
T238K	4996	SOL	3934.9	1413.42	237.328	1.07697	0.813826	1.32443	5043.25	1686	2680	-0.315986	0.175706	1.94
H242L	5063	SOL	2402.56	657.423	136.246	0.65787	0.385099	0.750333	5309.75	1512.5	6920	-0.588078	0.114076	6.06
H242F	5064	SOL	2119.31	440.68	116.657	0.582658	0.254254	0.649014	1167.5	659.75	6523.75	-0.86264	0.0842964	2.57
H242V	5065	SOL	3077.4	1137.31	170.872	0.842936	0.649983	0.951733	4687.5	1074.5	4579	-0.28753	0.0929811	5.25
H242C	5066	SOL	2964.78	819.414	153.78	0.814069	0.473853	0.857335	4081.5	171.25	4900.5	-0.578083	0.0248728	11.07
H242A	5068	SOL	3001.25	789.804	153.312	0.821245	0.472581	0.851928	1379.5	501.5	11189	-0.627114	0.00959223	1.42
H242W	5069	SOL	2836.9	1365.62	160.971	0.778509	0.797589	0.893509	2030.75	779.25	9622.75	-0.0232183	0.114661	7.58
H242T	5070	SOL	3260.71	1134.11	190.13	0.892391	0.667755	1.04701	4236	1117.5	4692.75	-0.348207	0.141913	3.52
H242Y	5071	SOL	2646.74		156.785	0.72453		0.872188	2315.75		5919.25		0.157699	7.92
H242G	5072	SOL	3235.8		180.107	0.883476		0.979451	4288.75		1252.25		0.0954294	5.63
H242S	5073	SOL	3441.08	1070.31	177.14	0.940472	0.611723	0.984882	1916	524.75	6525	-0.45995	0.0173069	2.5
H242N	5074	SOL	1900.54	1383.89	194.025	0.519186	0.791628	1.07913	888.25	1057.25	11537	0.390647	0.702	3.63
H242P	5076	SOL	4278.1		273.516	1.17058		1.51261	3152.5		8643.75		0.233999	6.02
H242Q	5077	SOL	3631.51	862.177	192.613	0.995448	0.509265	1.07348	4821	581.5	5377	-0.730057	0.0471824	4.26
H242R	5078	SOL	3910.28	2016.82	261.673	1.06752	1.15671	1.45637	4478.5	483.75	11706	0.0458001	0.279636	-0.07
H242E	5079	SOL	3093.7	1378.15	162.049	0.848257	0.794141	0.899556	2144.5	549	6551	-0.100738	0.0346858	4.66
H242K	5080	SOL	4244.62		279.672	1.16116		1.54914	1931		4271.25		0.264118	2.6
H242D	5081	SOL	3062.43	1337.35	172.873	0.837925	0.778999	0.962592	2688.25	577.5	9228.75	-0.120629	0.109499	3.42
R246I	5146	SOL			173.809			0.963414			9008.5			5.49
R246L	5147	SOL	1996.56		213.575	0.547503		1.18002	3132.25		7169.25		0.748711	6.06
R246F	5148	SOL	2878.78		177.347	0.78988		0.993974	5736.25		5779		0.196894	5.66
R246V	5149	SOL	2747.41		178.797	0.749965		0.993791	3194.25		343		0.251741	5.5
R246C	5150	SOL	2861.35	966.114	220.58	0.781594	0.565182	1.21877	10631.8	2019	4694	-0.377882	0.421115	5.83
R246M	5151	SOL	1932.35		215.408	0.530044		1.1917	4273		2409.75		0.789945	3.64
R246A	5152	SOL	3157.46		202.663	0.865628		1.13089	3092.75		4422.25		0.23793	5.36
R246W	5153	SOL	2231.88	1001.78	150.508	0.610797	0.591129	0.833761	2305.5	307.75	6037.75	-0.0931765	0.287322	6.68
R246T	5154	SOL	3074.06		215.885	0.841148		1.19638	1479		11243.8		0.327897	6.84
R246Y	5155	SOL	2004.71	756.56	191.221	0.549665	0.448279	1.06353	3179.5	1189.75	13595.2	-0.266589	0.634077	6.3
R246G	5156	SOL	3747.18		216.549	1.0275		1.20074	5568.5		4939.75		0.132963	1.42
R246S	5157	SOL	3337.04		203.996	0.913017		1.13472	3067.5		13972.5		0.189167	5.34
R246N	5158	SOL	3824.74		217.053	1.04513		1.20221	1828.25		6822		0.1148	4.4
R246H	5159	SOL	3658.04	1343.09	211.076	1.00229	0.782358	1.17055	5356.5	1194	15221.2	-0.294072	0.131442	2.15
R246P	5160	SOL	2819.62	1179.2	157.628	0.774221	0.686575	0.878088	2854.5	848	7575.25	-0.16388	0.0997859	9.5
R246Q	5161	SOL	2617.57		205.697	0.718239		1.13413	1181.25		8165.75		0.440306	4.99
R246E	5163	SOL	1339.58		155.556	0.368345		0.838031	1469.75		426.5		0.830797	3.21
R246K	5164	SOL	3661.4		194.902	1.00196		1.07357	1780.5		2119.25		0.0508024	0.6
R246D	5165	SOL	3201.51	875.994	188.545	0.881508	0.520655	1.0486	892.75	229.25	5062.75	-0.588133	0.151862	0.97
L250I	5230	SOL	3483.29	1653.48	215.858	0.95391	0.967955	1.1961	2574.25	724.5	8272.25	-0.0372056	0.202797	-4.25
L250F	5232	SOL	4004.71		212.125	1.09739		1.17934	6019		8980.75		0.0458556	1.11
L250V	5233	SOL	4104.05	1734.22	212.798	1.12358	1.01766	1.17302	4443.25	569.25	8361	-0.153529	0.0245208	-1.72
L250M	5235	SOL	4014.64	511.222	205.755	1.09574	0.275604	1.14899	3444.75	537	4852.25	-1.35301	0.0128906	-2.12
L250A	5236	SOL	4010.47		227.669	1.0979		1.26903	1887		4591.75		0.115135	1.21
L250W	5237	SOL	3376.17		212.046	0.926724		1.17812	2280		1966.5		0.21621	-3.31
L250T	5238	SOL	3772.95		216.108	1.03194		1.19689	1260.25		13153.5		0.124071	-1.24
L250Y	5239	SOL	3682.46		214.279	1.00693		1.19198	2921		7603		0.139847	-0.4
L250G	5240	SOL	3680.57		250.771	1.00961		1.37982	2305		3816.75		0.297624	0.32
L250S	5241	SOL	3779.12		233.604	1.03495		1.29953	3513		3626		0.200287	-2.81
L250N	5242	SOL	3754.37		162.521	1.02959		0.905131	2222.25		177		-0.155965	-1.03
L250H	5243	SOL	4181.16	1314.03	226.636	1.14404	0.775631	1.25575	6943	1098.75	11225.8	-0.449608	0.0689055	-4.73
L250P	5244	SOL	3682.9		221.499	1.00842		1.22665	3499.5		9652.25		0.172867	1.14
L250Q	5245	SOL	3676.12	1487.89	213.13	1.00927	0.844499	1.18306	1953.75	915.75	13762.2	-0.196612	0.136195	-1.57
L250R	5246	SOL	4183.37		231.012	1.1448		1.27574	2432.25		4197.75		0.0875027	-1.3
L250E	5247	SOL	4139.37	1760.28	220.519	1.13332	1.03659	1.23063	4304	420.5	7125	-0.147184	0.05159	-1.28
L250K	5248	SOL	3609.8		205.216	0.987693		1.13147	5011.75		2874.5		0.116564	-4.95
L250D	5249	SOL	3920.02		215.154	1.07266		1.19473	7108.5		12071.2		0.0814085	-0.12
K254I	5314	SOL	4266.16		256.426	1.16598		1.43242	5697.75		7622		0.172277	0.99
K254L	5315	SOL	3780.17	1659.44	219.596	1.03508	0.995736	1.2244	6851	1138.75	5286.25	-0.115404	0.138171	2.29
K254F	5316	SOL	4025.69		229.042	1.10099		1.26649	1310.75		6349.25		0.117358	3.62
K254V	5317	SOL	4502.62		259.55	1.23113		1.43162	1723		4983.5		0.130441	4.04
K254C	5318	SOL			218.861			1.22652			864.5			5.96
K254M	5319	SOL	3618.26		231.969	0.992906		1.29477	4176		6954		0.236762	3.01
K254A	5320	SOL	4476.88	1431.12	216.857	1.22389	0.827225	1.21118	675.25	1732.25	4226.5	-0.432582	-0.0435386	5.8
K254W	5321	SOL	3117.46	1083.11	236.424	0.849832	0.633537	1.30988	396.5	573.5	3843	-0.349296	0.404761	0.9
K254T	5322	SOL	3551.24		222.801	0.971853		1.24007	3046.75		9983.25		0.215132	2.18
K254Y	5323	SOL	4129.89		271.591	1.12926		1.51217	6178.25		6404.25		0.262196	4.45
K254G	5324	SOL	4118.57		191.714	1.12809		1.04685	3936		4970.25		-0.0833499	4.9
K254S	5325	SOL	4209.28		237.336	1.15221		1.3178	418.75		3633.5		0.108337	6.49
K254N	5326	SOL			189.281			1.05214			4555.75			1.84
K254H	5327	SOL	3924.51	1691.26	223.136	1.07092	0.97547	1.23822	1901.5	654.25	6436	-0.133884	0.11669	5.65
K254P	5328	SOL	3396.74	1315.24	209.846	0.934611	0.766269	1.15529	348.25	1577	7804.5	-0.240908	0.19971	10.84
K254Q	5329	SOL	2665.84	1237.53	218.963	0.72766	0.733766	1.21795	957.5	1098	9701.25	-0.0595164	0.484533	1.89
K254R	5330	SOL	3709.52	1524.79	235.656	1.01646	0.851119	1.30062	2565.25	458.75	6076	-0.181157	0.227621	1.96
K254E	5331	SOL	3013.15	817.067	154.066	0.825656	0.468913	0.863167	4637	446.25	4820.75	-0.597134	0.0105437	3.54
K254D	5333	SOL	2759.85		138.149	0.754596		0.76712	955		3003.75		-0.0106958	2.67
P258I	5398	SOL			125.818			0.703693			209.75			-0.67
P258L	5399	SOL	2367.16		111.638	0.651953		0.616955	537.75		2966.75		-0.0702807	1.04
P258F	5400	SOL			110.981			0.622192			921.5			1.71
P258V	5401	SOL	3119.46			0.857423			551.25					2.04
P258C	5402	SOL			137.491			0.761316			480			6.35
P258A	5404	SOL	2149.95		120.261	0.592885		0.66427	787.75		1466		0.100373	4.77
P258W	5405	SOL			110.361			0.610783			549			0.03
P258Y	5407	SOL		453.917	112.78		0.272027	0.62585		413.25	3060			0.49
P258G	5408	SOL			269.098			1.50739			1940.5			2.42
P258S	5409	SOL	3238.25			0.883839			1206.75					1.76
P258N	5410	SOL			191.699			1.05682			1037.25			1.02
P258H	5411	SOL	2381.85		124.944	0.65498		0.688675	3739.75		431.25		0.0361368	-0.61
P258E	5415	SOL			98.4026			0.541697			766.5			4.36
P258K	5416	SOL		895.916			0.517458			957				3.68
P258D	5417	SOL	2185.05		120.814	0.601046		0.665119	1651.5		1659		0.0887642	2.97
L262I	5482	SOL	3804.27	1415.25	246.952	1.04022	0.824453	1.37906	1000.5	378.25	4059.75	-0.280933	0.24922	-2.89
L262F	5484	SOL	1281.23		99.262	0.353228		0.549243	1212.5		2359.25		0.426089	3.27
L262V	5485	SOL	3868.16		190.713	1.05856		1.06601	2804.5		7481.75		-0.0258581	0.34
L262M	5487	SOL	3674.44		182.576	1.00509		1.01449	2140.75		9856.75		-0.0180815	0.61
L262A	5488	SOL	3182.44		163.378	0.867444		0.918982	896		776.25		0.014567	-1.73
L262W	5489	SOL	1160.3	322.187	101.792	0.317888	0.185085	0.567934	2519.5	1490	4487	-0.573415	0.550398	0.64
L262T	5490	SOL	1796.03	474.644	118.134	0.49429	0.283045	0.655741	2046.75	489	1312	-0.622885	0.262387	-2.52
L262Y	5491	SOL	3254.02		141.688	0.890115		0.797886	340.75		3075.25		-0.150109	-3.36
L262G	5492	SOL	1122.36		107.311	0.307205		0.599658	2120.25		3225		0.636445	4.04
L262S	5493	SOL	1462.88		104.731	0.401794		0.577572	733.75		2625		0.347142	1.51
L262N	5494	SOL	1119.44	368.22	103.482	0.307971	0.220554	0.574141	1723.5	391.75	3566.5	-0.404022	0.602715	3.34
L262H	5495	SOL	3143.91		134.576	0.862942		0.748649	4262.5		7945.75		-0.16719	2.72
L262P	5496	SOL	693.108		95.8941	0.190958		0.533613	1337.75		3115		1.00596	1.2
L262Q	5497	SOL	3390.23	1378.33	168.406	0.929306	0.807387	0.93131	2156.5	835.75	3923	-0.192137	-0.018369	-2.13
L262R	5498	SOL	3793.69	1829.59	236.669	1.03883	1.06847	1.30774	2880	2250.5	5079.25	-0.0213594	0.209475	-1.82
L262E	5499	SOL	1787.84			0.49054			3952.5					-0.19
L262K	5500	SOL		1187.32	151.162		0.667266	0.832435		338	1390.25			0.09
K266I	5566	SOL	1733.74	514.235	137.955	0.473728	0.289309	0.763924	2452.25	143.25	6440.75	-0.507472	0.452794	-0.87
K266L	5567	SOL	2000.29		146.731	0.548313		0.820165	1419		2053.5		0.37146	0.73
K266F	5568	SOL	1982.81	480.104	136.977	0.544222	0.278235	0.769048	1863	1309	3564.5	-0.710383	0.311443	2.46
K266V	5569	SOL	1606.99	362.54	133.589	0.44086	0.193281	0.74751	2784	470.5	5214.25	-0.781096	0.496557	0.95
K266C	5570	SOL	1932.15	634.366	113.732	0.531035	0.364194	0.630469	1929.75	1228.5	5453.25	-0.405874	0.151363	6.42
K266M	5571	SOL	1998	631.826	162.422	0.547279	0.364992	0.898897	3146.5	564.5	9790.75	-0.443401	0.474201	-1.15
K266A	5572	SOL	951.616	317.361	107.014	0.262012	0.181848	0.592736	2815.5	299.5	8174.25	-0.390235	0.798701	4.51
K266W	5573	SOL	2344.23	655.959	142.346	0.642374	0.378744	0.791488	1860.5	1991.25	6709.25	-0.565727	0.182455	1.34
K266T	5574	SOL	1620.34	708.546	114.65	0.444957	0.428317	0.63318	3726	1013.5	2073.5	-0.11929	0.335399	4.26
K266Y	5575	SOL		1676.61	209.68		0.979661	1.16881		1201.5	7312.25			5.63
K266G	5576	SOL	1380.06		112.195	0.379768		0.619993	5644		4429.75		0.474263	5.24
K266S	5577	SOL	1227.18	264.4	102.218	0.337357	0.153308	0.567159	1265.5	1068	11485.8	-0.827122	0.498545	5.03
K266N	5578	SOL	997.298		103.642	0.272272		0.574556	4287.75		9401		0.719794	1.71
K266H	5579	SOL	3202.3		215.222	0.876184		1.21116	5289		3516.5		0.283951	5.84
K266P	5580	SOL	1086.51		102.821	0.298582		0.569647	4502		7774		0.626172	7.72
K266Q	5581	SOL	4564.64	1989.78	276.541	1.24788	1.14422	1.53082	2448.25	1196.5	4926.25	-0.122428	0.180171	4.57
K266R	5582	SOL	2984.56	927.175	160.828	0.818395	0.536879	0.88901	4301.5	838.25	4095.25	-0.46118	0.0630345	1.79
K266E	5583	SOL			98.9724			0.550175			2993.75			5.69
K266D	5585	SOL	580.834		103.767	0.158187		0.581973	2500		5479		1.26159	4.22
F271I	5671	TMD	3417.73		221.377	0.932967		1.22826	2747		5494.25		0.247039	-4.55
F271L	5672	TMD			285.528			1.5976			4708.75			-5.15
F271V	5674	TMD	1243.02		109.83	0.341084		0.607158	4363		3439.25		0.55754	-4.82
F271C	5675	TMD	1481.05	355.922	100.443	0.407267	0.208881	0.554786	4282.75	543.5	4053	-0.717907	0.292987	1.8
F271M	5676	TMD	4037.87	1851.03	303.753	1.10864	1.06222	1.67599	816.5	779.5	2543.5	-0.0720871	0.396649	-4.14
F271A	5677	TMD	1478.07		101.62	0.407757		0.564702	2616.25		7401.5		0.306654	0.33
F271W	5678	TMD	322.131	144.098	95.7218	0.0883207	0.082604	0.530677	1329.5	511.25	2122	-0.0965812	1.77039	-5
F271T	5679	TMD	827.401	199.079	96.5449	0.22836	0.115797	0.537067	1055.75	1311.5	5134.5	-0.716702	0.835624	-0.06
F271Y	5680	TMD	4055.37		176.07	1.108		0.974048	5352.75		7848.5		-0.153008	-1.72
F271G	5681	TMD	1846.53		119.298	0.50752		0.667005	3088		7808.5		0.244466	0.54
F271S	5682	TMD	1665.24		95.8405	0.458199		0.533277	2720		7662.5		0.128865	-2.64
F271N	5683	TMD	391.549		95.7963	0.107086		0.533496	3700		3432.25		1.57602	0.1
F271H	5684	TMD	385.13		95.3779	0.105825		0.529497	2900		5477		1.58817	-3.18
F271P	5685	TMD	319.254	184.753	96.2467	0.0877414	0.104622	0.533414	10154.2	348	5239.25	0.160919	1.78483	0.3
F271Q	5686	TMD	377.524		97.4206	0.103668		0.544202	4670		3587.5		1.62931	-3.13
F271R	5687	TMD	386.627		95.9897	0.106254		0.533115	4450.5		7890		1.59069	-5.03
F271E	5688	TMD	457.336			0.124658			3852					-0.52
F271K	5689	TMD	501.54		94.553	0.138722		0.52406	1297.5		1604.75		1.31538	-0.91
F271D	5690	TMD	472.222	211.695	93.6106	0.130136	0.117449	0.519157	1652.5	1136	7504.25	-0.094414	1.3656	2.12
T273I	5713	TMD	2380.59		162.002	0.652901		0.913564	1773		1881.75		0.296412	-9.13
T273L	5714	TMD	2064.11		126.366	0.565795		0.701476	1301		4672.25		0.190629	-5.52
T273F	5715	TMD	2555.85		128.234	0.7023		0.717149	504.5		4852.5		-0.00837816	-4.1
T273V	5716	TMD	2983.15		190.664	0.813166		1.05254	578		2712.5		0.233683	-4.08
T273C	5717	TMD	3085.36		163.455	0.847085		0.907448	619.75		2893.75		0.046018	2.47
T273M	5718	TMD			121.33			0.671825			4178.5			-0.74
T273A	5719	TMD	3960.18		184.617	1.08195		1.01414	7199		2570.5		-0.0818556	-0.52
T273W	5720	TMD			83.2712			0.461927			1166.5			-3.85
T273Y	5722	TMD	429.424		96.4136	0.118623		0.535691	657.25		3662		1.49011	-1.21
T273G	5723	TMD	2199.6		125.572	0.603818		0.70567	2105.5		2792		0.120751	-0.68
T273S	5724	TMD	2573.56		138.216	0.704454		0.766356	4656.75		4498.75		0.0596801	2.58
T273N	5725	TMD	1575.56		92.9059	0.423303		0.512493	1102.5		1763.25		0.153127	2.89
T273H	5726	TMD	327.368		107.058	0.0896412		0.596883	634.5		5203		1.8662	1.54
T273P	5727	TMD	464.931		94.1079	0.128248		0.521141	742		7727.75		1.38646	6.28
T273Q	5728	TMD			97.1497			0.539921			2473.25			1.06
T273R	5729	TMD	2148.03		96.905	0.588368		0.538364	19.5		819.25		-0.114671	-0.11
T273E	5730	TMD	418.102		92.0611	0.113879		0.51657	584		1733.25		1.47063	3.39
T273D	5732	TMD	336.309		92.0399	0.0920481		0.510194	2507.25		4481.25		1.6881	2.89
F275I	5755	TMD	602.677		83.5093	0.16613		0.46436	4040		607		1.00748	-2.91
F275V	5758	TMD	430.678		95.2967	0.117336		0.530197	791.5		3171		1.47554	-2.17
F275C	5759	TMD	375.189		96.8654	0.103045		0.537302	1300.25		1314		1.6298	4.63
F275M	5760	TMD	315.873		109.051	0.0866919		0.604411	1289		1972.5		1.92038	0.81
F275A	5761	TMD	510.653		115.034	0.140482		0.638721	4998		4857.5		1.49344	0.76
F275W	5762	TMD	4449.71		314.221	1.21789		1.73503	510.25		4045.75		0.333407	-6.13
F275T	5763	TMD	371.644		95.2413	0.1017		0.525956	1920.25		5787.75		1.62238	1.34
F275Y	5764	TMD	3698.43		286.375	1.01119		1.5973	3811		3807.25		0.425546	-0.12
F275G	5765	TMD	477.08		111.061	0.130401		0.619556	1991.5		765.75		1.5263	7.19
F275S	5766	TMD	410.898		98.3635	0.112702		0.551882	1970.75		787.25		1.55423	0.77
F275N	5767	TMD	486.59		102.441	0.13278		0.572918	1818		6578.5		1.42577	4.38
F275H	5768	TMD	4372.71		260.828	1.19698		1.45381	3933.5		8744.75		0.164629	2.17
F275P	5769	TMD			93.9289			0.521093			11944.2			8.71
F275Q	5770	TMD	371.881		91.5259	0.101997		0.50922	1208		3677.75		1.58195	3.34
F275R	5771	TMD	4482.35		230.004	1.22631		1.26998	3244		4771.75		0.014098	-1.87
F275E	5772	TMD	394.89		94.0876	0.108369		0.524176	1566.75		6907		1.54952	5.68
F275K	5773	TMD	3712.67		121.626	1.0168		0.670844	1139.5		4104.25		-0.434646	0.6
F275D	5774	TMD	420.754		95.1543	0.114497		0.528874	1434		4712.75		1.49736	8.22
V277I	5797	TMD	2335.92		194.864	0.643375		1.07107	2701		6633.25		0.500047	2.65
V277L	5798	TMD	1896.65		115.315	0.522593		0.642173	2286.5		5334.25		0.183725	-0.18
V277F	5799	TMD			103.38			0.572221			4667			4.22
V277C	5801	TMD	1456		114.535	0.400147		0.640013	405.75		3161.25		0.441343	5.13
V277A	5803	TMD	788.017		104.415	0.216295		0.579195	4267.5		9731.75		0.962764	3.17
V277W	5804	TMD	566.862		89.88	0.154282		0.501649	3099		4122		1.14226	3.89
V277T	5805	TMD	1236.03		107.728	0.339537		0.596215	476.75		7122.75		0.543862	1.16
V277Y	5806	TMD	1293.42		91.5079	0.3558		0.508237	2348.75		3346.25		0.33529	4.64
V277G	5807	TMD	626.527		98.3044	0.172016		0.546697	6175.25		4485.75		1.13178	3.27
V277S	5808	TMD	582.595		100.558	0.159334		0.55467	4130.75		5801		1.22715	5.05
V277N	5809	TMD	332.241		91.6095	0.0908601		0.508436	2008.25		3695.5		1.69558	5.44
V277H	5810	TMD			91.6974			0.509961			6974.5			7.04
V277P	5811	TMD	492.152		102.13	0.135533		0.564799	4979.25		5959		1.41136	7.55
V277Q	5812	TMD	466.317		102.79	0.127086		0.575822	699.25		1360.75		1.47173	5.64
V277E	5814	TMD	400.284		95.2909	0.109469		0.527473	1508		3763.75		1.54867	8.36
V277K	5815	TMD	326.365		93.5078	0.089556		0.517778	2315.75		5058		1.73393	5.47
V277D	5816	TMD	465.704		96.1708	0.127383		0.530777	2167.5		7631.25		1.40648	7.53
C278I	5818	TMD	487.628		100.487	0.134452		0.5557	1013.5		5728.5		1.40438	0
C278F	5820	TMD			189.269			1.06037			5482.25			-2.25
C278A	5824	TMD	492.213		99.3831	0.135199		0.550585	3806		6081.5		1.38398	-1.78
C278W	5825	TMD	985.218		125.406	0.2696		0.69613	2548		2459.25		0.922598	-4.88
C278T	5826	TMD	1226.25		96.0824	0.337115		0.530971	1073.25		6259.75		0.437397	-0.19
C278Y	5827	TMD	332.155		96.4484	0.0910807		0.535099	1234.5		2771.25		1.74731	-4.56
C278G	5828	TMD	529.225		99.3293	0.145251		0.550227	6046.75		9937.5		1.31093	4.57
C278S	5829	TMD	376.724		95.0149	0.103208		0.525619	3433		5785.5		1.60643	-3.83
C278N	5830	TMD	325.518		96.6754	0.0895071		0.53539	1620		5304		1.76985	-3.53
C278H	5831	TMD	531.1		97.6217	0.146148		0.537451	887.25		9186		1.29005	-3.28
C278P	5832	TMD			98.6619			0.545491			5181.5			8.39
C278Q	5833	TMD			93.9288			0.519011			4128.25			-0.26
C278R	5834	TMD	361.128		94.6167	0.0986151		0.523928	707.75		1559.5		1.64451	-2.15
C278E	5835	TMD	530.937			0.144689			773					-0.27
C278K	5836	TMD	569.85		98.8193	0.155227		0.548986	1841.25		5257		1.23182	-0.46
C278D	5837	TMD	333.501		98.0657	0.0912599		0.545708	4052.75		4056		1.7599	-0.07
L285F	5967	TMD	1790.44			0.493121			2153.5					1.81
L285V	5968	TMD		1108.42			0.664205			425				-0.42
L285C	5969	TMD	1890.83			0.520263			1873					4.55
L285M	5970	TMD	4397.96	1513.59	154.573	1.20358	0.877903	0.85004	2397.75	273.5	537.75	-0.358768	-0.364326	-4.49
L285A	5971	TMD	3079.49		123.483	0.847863		0.688369	783		2208		-0.232512	1.25
L285W	5972	TMD			112.683			0.628972			181.25			-0.77
L285T	5973	TMD	3096.97		129.645	0.851267		0.719896	2151.5		1238.25		-0.189478	3.59
L285G	5975	TMD	1254.83		106.599	0.345921		0.588254	1802.25		1193.5		0.518224	1.2
L285S	5976	TMD	3987.2		151.996	1.09169		0.837354	852		812		-0.283085	2.46
L285N	5977	TMD	2634.32		137.834	0.723608		0.772655	1131		2871.5		0.0335755	1.32
L285H	5978	TMD	4495.45		206.104	1.23309		1.1494	740.25		3406.75		-0.0985338	5.37
L285Q	5980	TMD	2523.18	870.684	149.932	0.694124	0.513477	0.838386	1024.25	452.5	3017	-0.356111	0.160808	0.22
L285R	5981	TMD			222.953			1.24398			1431.75			2.32
L285E	5982	TMD			96.3672			0.530781			3169			4.1
L285K	5983	TMD	2355.77	630.573	170.03	0.643868	0.378413	0.958702	1117.25	1083.75	1333	-0.610108	0.355255	1.85
L285D	5984	TMD	3001.92	187.176		0.818999	0.106935		754.5	856.5		-2.06707		4.72
W288L	6029	SOL	4245.86			1.15951			1527.75					-0.48
W288V	6031	SOL			254.479			1.43399			316.5			2.81
W288M	6033	SOL	3459.85			0.945815			1374.75					-1.14
W288Y	6037	SOL			145.839			0.809392			1256.25			1.67
W288N	6040	SOL	1129.44			0.310042			487.5					1.64
W288Q	6043	SOL	1355.3			0.370738			270.75					2.41
W288E	6045	SOL	718.901			0.198171			833					3.51
W288K	6046	SOL			105.806			0.585951			1967.5			1.06
M295I	6175	SOL	2397.84		178.009	0.651722		1.00241	1048		266		0.383418	1.7
M295V	6178	SOL			156.887			0.872343			1218			1.18
M295A	6181	SOL	4143.99	1849.87		1.13674	1.07491		748.25	1063.5		-0.0986583		2.62
M295W	6182	SOL			92.9314			0.511572			964.5			0.63
M295G	6185	SOL			157.188			0.88417			1394			-1.29
M295N	6187	SOL	3952.23			1.0813			1653.25					1.28
M295H	6188	SOL			176.007			0.97271			2551			-2.93
M295Q	6190	SOL	4069.55			1.11908			711.5					-4.2
M295R	6191	SOL	3434.41		235.499	0.942857		1.30188	539.75		987		0.304015	-6.78
M295E	6192	SOL			121.249			0.675809			899.5			-1.55
M295K	6193	SOL	2350.81		209.146	0.643666		1.15624	740.75		1533.5		0.564422	-6.67
V299I	6259	SOL	3407.95		177.731	0.938235		0.995121	1548.75		1296		0.0303123	2.24
V299L	6260	SOL	2394.18	409.356		0.657727	0.241886		1405.25	675.5		-1.05833		-4.59
V299F	6261	SOL	1215.44			0.335712			976.25					-4.93
V299M	6264	SOL	2242.87		121.788	0.614058		0.682456	1446.25		2223.75		0.0706775	-2.48
V299A	6265	SOL	1832.71			0.505511			488.5					-6.93
V299W	6266	SOL	1534.36		100.065	0.420699		0.553609	1551		2478.75		0.253854	1.55
V299Y	6268	SOL			92.7854			0.51206			2476.5			-4.76
V299G	6269	SOL	2796.63		99.2404	0.764525		0.552216	534.75		2085		-0.354721	-2.21
V299S	6270	SOL		529.329	115.416		0.302691	0.643282		712.75	1497.75			-5.81
V299N	6271	SOL	2306.9		111.069	0.634641		0.60407	238.25		983.75		-0.0496023	-4.67
V299Q	6274	SOL		477.604			0.268067			906.75				-6.94
V299R	6275	SOL	1387.3		102.378	0.383511		0.566999	395		2510		0.377466	-5.04
V299E	6276	SOL	1470.33		103.002	0.404278		0.576299	2463.25		1607.25		0.325406	-3.88
V299K	6277	SOL	2391.6		104.194	0.658228		0.583421	1292.75		1230		-0.149557	-3.83
V299D	6278	SOL	1802.61		103.761	0.495881		0.581491	3966.75		2048.25		0.129	-4.73
V303I	6343	SOL			194.826			1.08842			1366			2.83
V303L	6344	SOL			154.303			0.858109			2292.5			-2.6
V303F	6345	SOL	1511.37		102.595	0.415813		0.569292	496.75		860		0.29393	4.8
V303M	6348	SOL	2212.68		137.253	0.608881		0.757128	1658.75		2517		0.203773	-4.3
V303A	6349	SOL	1444.6		99.6408	0.39676		0.553074	602		6649.5		0.309888	4.62
V303W	6350	SOL	3694.38		190.839	1.01168		1.06496	2365.25		6256.25		0.020769	1.84
V303T	6351	SOL			137.205			0.750832			2124.25			2.47
V303Y	6352	SOL	1944.96	1078.07	111.655	0.531893	0.621464	0.62431	3301	229.75	833.5	0.117814	0.126318	2.91
V303G	6353	SOL	442.576		93.8568	0.121544		0.520965	1290.75		3050.25		1.43306	4.04
V303S	6354	SOL	706.512	273.82	99.2344	0.192924	0.153529	0.556181	945.75	615.25	527	-0.239982	1.02105	1.55
V303N	6355	SOL			88.4353			0.494259			733.5			4.3
V303H	6356	SOL	1379.59		92.7247	0.371019		0.510307	908		1039.25		0.283998	6.85
V303P	6357	SOL	556.321			0.152154			711					4.38
V303Q	6358	SOL	375.91		88.2811	0.103311		0.491844	956.25		615		1.53508	1.13
V303R	6359	SOL			94.8142			0.525789			1043.75			-0.08
V303E	6360	SOL	703.173		97.5674	0.193024		0.544399	5111		3139		1.00885	3.12
V303K	6361	SOL			92.6367			0.514349			1783			-4.9
V303D	6362	SOL	405.864		94.138	0.111147		0.520981	1364.75		2804.75		1.52265	4.79
F310I	6490	TMD			127.188			0.703193			1676.5			-4.29
F310L	6491	TMD			191.852			1.0644			3296.25			0.13
F310V	6493	TMD		751.269	155.717		0.453582	0.882162		288.5	1958.5			1.04
F310C	6494	TMD			101.232			0.560263			2753.75			3.24
F310M	6495	TMD			128.129			0.70796			1486.75			0.73
F310A	6496	TMD	808.282		94.803	0.222181		0.528767	2749		5758		0.840796	1.35
F310T	6498	TMD	666.097		95.3728	0.183378		0.531427	1503.25		2046.25		1.04026	0.84
F310Y	6499	TMD	783.939		94.8459	0.217932		0.525362	811		1954.75		0.871828	4.52
F310G	6500	TMD		206.041	98.8977		0.114522	0.553676		1817	3346.5			4.41
F310N	6502	TMD	306.86		94.5002	0.0845236		0.531628	938.75		928.5		1.80612	2.87
F310H	6503	TMD			125.365			0.694834			1825.25			5.28
F310Q	6505	TMD	364.284			0.100295			653.25					2.77
F310E	6507	TMD	364.126		88.4196	0.100291		0.491439	857.5		936.75		1.5685	5.46
F310K	6508	TMD	449.542		89.4089	0.123742		0.494959	1283		1188.75		1.3689	0.09
F310D	6509	TMD	320.613	244.523	114.764	0.0878755	0.139605	0.646057	511.5	415.25	637.75	0.43696	1.95655	4.6
A311V	6514	TMD			87.0715			0.480641			1008.75			-2.28
A311M	6516	TMD			119.264			0.664439			281.75			-2.1
A311T	6519	TMD	861.593			0.235515			1279					-3.44
A311Y	6520	TMD			98.0572			0.542418			4673.5			9.94
A311G	6521	TMD			197.468			1.10553			1508			1.47
A311P	6525	TMD	485.087			0.132186			451					8.14
A311Q	6526	TMD			87.0619			0.484773			925			2.12
A311R	6527	TMD		436.562			0.252627			2468.25				-2.7
A311D	6530	TMD	475.951		100.975	0.130201		0.559608	453.5		2455.75		1.43346	3.77
F317I	6637	TMD	4590.11		221.676	1.25397		1.23414	3213		8343.25		-0.0465362	-6.05
F317L	6638	TMD	5129.83		280.532	1.40627		1.56788	1209.25		2246		0.0777658	-1.2
F317V	6640	TMD	4047.26	1241.72	157.327	1.11198	0.708537	0.871405	871.25	954.25	3976.75	-0.473654	-0.263564	-2.5
F317C	6641	TMD	1297.76		127.909	0.356228		0.710171	4120.75		14455.2		0.666828	2.2
F317M	6642	TMD	4428.82		283.118	1.21106		1.57218	2243.5		8390.75		0.233883	-3.5
F317A	6643	TMD	1925.85	542.357	127.883	0.52861	0.322381	0.717047	3790.25	744.75	1652.75	-0.55931	0.271901	1.1
F317W	6644	TMD	837.192		92.7929	0.229041		0.515323	345.25		3045.5		0.784223	-2.54
F317T	6645	TMD	4140.12	1953.72	230.251	1.13275	1.14484	1.26669	2676	1185.75	2071	-0.0431029	0.0945941	2.47
F317Y	6646	TMD	472.881		100.323	0.130331		0.556996	3888		4769.75		1.43346	0.09
F317G	6647	TMD	638.539	194.753	101.409	0.175587	0.112054	0.562852	4105.5	595	3558	-0.479566	1.14389	3.1
F317S	6648	TMD	2604.68	823.015	181.214	0.715372	0.47149	1.00901	2368	656.75	3756.25	-0.444206	0.318518	3.52
F317N	6649	TMD	386.907		107.569	0.106026		0.602574	6882.5		3227.25		1.70386	0.39
F317H	6650	TMD	420.53	437.659	95.8296	0.115254	0.229395	0.533586	1851.25	2064.75	6081.75	0.747811	1.50496	0.34
F317P	6651	TMD		290.261	92.5432		0.170065	0.519356		1569.25	2021.25			13.19
F317Q	6652	TMD	749.709			0.207105			3264.25					-0.8
F317R	6653	TMD	579.572	852.635	104.872	0.157556	0.548065	0.578094	5273.5	489	3814.75	1.09393	1.27436	3.23
F317E	6654	TMD	470.991	380.423	93.838	0.128976	0.203818	0.5233	554	735.75	4329.75	0.494332	1.37064	2.9
F317K	6655	TMD	696.005		93.7166	0.189155		0.520166	294.75		5449.75		0.978824	1.08
F317D	6656	TMD	516.457		101.701	0.140486		0.56846	1978.75		9302		1.35895	1.91
D318I	6658	TMD	3090.42		154.366	0.845268		0.856195	1456		5054.75		-0.0128307	3.23
D318L	6659	TMD		610.473			0.334995			765				2.57
D318F	6660	TMD	1152.42		97.5707	0.310745		0.539719	1078.25		1506.25		0.514865	4.02
D318V	6661	TMD	4068.6		219.983	1.11522		1.19384	2278.75		450.75		0.0664038	3.49
D318C	6662	TMD		1672.25	263.552		0.939536	1.45818		576.25	7143.75			-3.67
D318M	6663	TMD	1324.93		96.5418	0.363488		0.533336	2068.5		1118		0.364771	-0.46
D318A	6664	TMD	4426.84	1490.82	140.63	1.21028	0.89247	0.781103	2800	491.75	4527.75	-0.380472	-0.465402	-1.83
D318W	6665	TMD			125.64			0.68808			3898.25			7.53
D318T	6666	TMD	4600.84	2054.49	285.397	1.25999	1.19542	1.57915	2981.25	573	2189.5	-0.0983219	0.203792	2.37
D318Y	6667	TMD	1872.11	1040.3	95.2888	0.51483	0.606217	0.533221	4639.75	1603.5	2264.5	0.12033	0.00599446	6.71
D318G	6668	TMD	2647.72		113.459	0.722891		0.629243	2147.75		4006.25		-0.166108	-5.26
D318S	6669	TMD	3379.64		151.29	0.924364		0.841048	3726.25		4246.25		-0.122418	-2.98
D318N	6670	TMD	4377.07		160.057	1.19664		0.883582	3059.75		6961		-0.324696	-4.64
D318H	6671	TMD	2328.32	510.09	101.972	0.638455	0.282487	0.56337	5323.25	1053.25	4690	-0.810428	-0.144294	2.23
D318Q	6673	TMD	1477.49		110.82	0.405782		0.609633	1085.5		4360.5		0.393715	-2.17
D318E	6675	TMD	570.917	162.644	96.7108	0.156117	0.0935752	0.538701	1518	1497.75	2420.25	-0.547795	1.20839	0.95
D318K	6676	TMD	469.489		98.784	0.127687		0.539586	798.75		490		1.4252	4.41
L320I	6700	TMD	3231.47	877.393	184.191	0.885533	0.493787	1.0214	5386.5	639.5	8001	-0.595851	0.119187	0.41
L320F	6702	TMD	3207.81		171.516	0.877616		0.96203	4063.25		7684.5		0.0552417	1.71
L320V	6703	TMD	4001.42	1291.61	177.376	1.09419	0.752205	0.979201	1109.5	630	7189.75	-0.422876	-0.132226	-0.61
L320C	6704	TMD	1031.31		97.153	0.282423		0.538418	3921.25		2683.25		0.621604	4.7
L320M	6705	TMD	2696.16		154.018	0.741401		0.8525	4442		745.25		0.121396	-2.49
L320A	6706	TMD	1760.76		110.646	0.483511		0.614633	2494.5		6348.75		0.216743	3.27
L320W	6707	TMD	2415.14		146.918	0.663907		0.824007	5098.75		1635.5		0.184268	-0.71
L320T	6708	TMD	437.709	143.728	92.4601	0.120207	0.0849927	0.515709	4280	97.25	2433.5	-0.405747	1.42913	4
L320Y	6709	TMD	805.697	210.555	103.4	0.220624	0.123666	0.578106	2611.5	612.75	8325.75	-0.634075	0.930799	3.42
L320G	6710	TMD	327.837		94.9441	0.0900488		0.525476	3020		1440.5		1.74468	4.34
L320S	6711	TMD	551.071	237.556	96.4688	0.151802	0.131772	0.535801	7150	1050.75	7923.5	-0.133572	1.24126	4.55
L320N	6712	TMD	737.74		93.5837	0.203599		0.520265	3272.75		9823.5		0.919172	1.46
L320H	6713	TMD	635.298	413.499	95.3236	0.174179	0.244144	0.526505	7953.75	1104.75	3824.5	0.278448	1.08709	6.71
L320P	6714	TMD	682.312		106.187	0.186399		0.587171	8038.75		8385.25		1.12362	9.46
L320Q	6715	TMD	970.333		96.3752	0.267298		0.538803	5492.75		5614.25		0.674515	2.3
L320R	6716	TMD	446.148	157.111	100.688	0.121975	0.0897922	0.55622	3454.5	999	3890.75	-0.335813	1.49528	-1.69
L320E	6717	TMD	390.575		92.7959	0.106708		0.51553	1799.5		3728.25		1.54669	4.86
L320K	6718	TMD	615.84	308.722	99.1387	0.169061	0.185092	0.550383	3360	1810	1934.5	0.017339	1.15744	1.87
L320D	6719	TMD	561.329		100.037	0.154088		0.557757	1228.75		3817.25		1.25914	3.4
Y322L	6743	TMD	409.873		93.5036	0.112699		0.522143	967		1002.25		1.50606	3.55
Y322F	6744	TMD	1967.18	492.121	103.053	0.540874	0.290324	0.570314	1411	551.75	6839.5	-0.677742	0.0347932	-0.83
Y322V	6745	TMD			122.46			0.688096			975			1.12
Y322A	6748	TMD	4593.24		278.668	1.25843		1.54473	823.75		2361.5		0.181588	-2.83
Y322T	6750	TMD	1550.3		114.198	0.42617		0.631634	1057.5		851.75		0.375636	1.43
Y322G	6752	TMD	4493.17		234.596	1.22502		1.318	829.75		594.75		0.0314565	4.62
Y322S	6753	TMD		1778.8	190.28		1.02895	1.06398		1316	1284			0.5
Y322H	6755	TMD	1386.5	340.988	127.432	0.379367	0.189251	0.697144	3103.5	534.75	2142	-0.694805	0.596955	2.43
Y322P	6756	TMD			123.519			0.677777			788.5			9.8
Y322Q	6757	TMD	391.267		91.1978	0.107089		0.50105	1888.25		2087		1.52755	-2.56
Y322R	6758	TMD	839.72		92.8837	0.231152		0.517004	1511.75		4959.75		0.782185	0.27
Y322E	6759	TMD			93.5193			0.520514			2452.5			3.73
Y322K	6760	TMD	1278.27		91.8728	0.350938		0.508056	3138.75		2601.5		0.35105	-1.81
Y322D	6761	TMD	467.27		90.6645	0.127905		0.503414	1491.75		3932.25		1.34416	2.8
L327F	6849	SOL	1674.29		120.447	0.456662		0.657848	399.75		1265.5		0.351972	0
L327V	6850	SOL	2944.82		218.845	0.804429		1.21331	1202.75		323.75		0.38447	-2.98
L327M	6852	SOL			265.462			1.4612			676			-3.91
L327A	6853	SOL			257.274			1.42502			2097.75			-3.2
L327W	6854	SOL	2798.15		195.356	0.765325		1.09198	1660.25		848.75		0.322014	-0.01
L327G	6857	SOL	4426.66			1.2103			1346.5					-5.29
L327P	6861	SOL			230.174			1.24619			560.25			-3.88
L327Q	6862	SOL	4211.72		259.171	1.15589		1.44624	1438.75		1285		0.19577	-4.88
L327R	6863	SOL	2982.11			0.817148			361.75					-5
